# Supplementary material for: Germline Genetic Variants in TEK, ANGPT1, ANGPT2, MMP9, FGF2 and VEGFA Are Associated with Pathologic Complete Response to Bevacizumab in Breast Cancer Patients
Source: PLoS One. 2017 Jan 3;12(1):e0168550. doi: 10.1371/journal.pone.0168550 (PMC5207665; doi:10.1371/journal.pone.0168550)
Supplement: S6 File — DOX Ten-gene SNP Annotations. This Excel file contains the SNP annotations for all SNPS inside the 10 target genes that were included on Illumina’s HumanOmni5-4 BeadChip for all SNPS inside the 10 target genes. (XLSX) [file pone.0168550.s006.xlsx]

## Sheet: DOX Ten-gene SNP Annotations
Name	Chr	Position	Gene_s_	Gene0
kgp10615455	17	62396845	PECAM1	PECAM1
kgp13858818	17	62397786	PECAM1	PECAM1
kgp14058979	17	62398069	PECAM1	PECAM1
kgp23859341	17	62398216	PECAM1	PECAM1
GA032860	17	62398530	PECAM1	PECAM1
rs7213889	17	62398568	PECAM1	PECAM1
kgp3526033	17	62399202	PECAM1	PECAM1
kgp4182012	17	62399872	PECAM1	PECAM1
rs1050382	17	62400000	PECAM1	PECAM1
kgp2481863	17	62400087	PECAM1	PECAM1
kgp13860154	17	62400355	PECAM1	PECAM1
kgp3144822	17	62400575	PECAM1	PECAM1
rs2278680	17	62400602	PECAM1	PECAM1
kgp3264625	17	62400710	PECAM1	PECAM1
rs13306807	17	62400749	PECAM1	PECAM1
GA014726	17	62400904	PECAM1	PECAM1
kgp14066706	17	62400915	PECAM1	PECAM1
kgp23900242	17	62400923	PECAM1	PECAM1
kgp13847402	17	62400973	PECAM1	PECAM1
kgp182034	17	62401032	PECAM1	PECAM1
rs2812	17	62401118	PECAM1	PECAM1
GA032868	17	62401206	PECAM1	PECAM1
kgp13890032	17	62401606	PECAM1	PECAM1
rs4968619	17	62401929	PECAM1	PECAM1
rs9892152	17	62401965	PECAM1	PECAM1
kgp8727216	17	62403154	PECAM1	PECAM1
rs1550792	17	62403328	PECAM1	PECAM1
kgp9477544	17	62403698	PECAM1	PECAM1
rs1470453	17	62404390	PECAM1	PECAM1
rs9303470	17	62404452	PECAM1	PECAM1
kgp896694	17	62404525	PECAM1	PECAM1
rs1108591	17	62405369	PECAM1	PECAM1
kgp12531061	17	62405976	PECAM1	PECAM1
kgp5551467	17	62406333	PECAM1	PECAM1
kgp5409482	17	62406374	PECAM1	PECAM1
kgp6882625	17	62406518	PECAM1	PECAM1
rs2070783	17	62406971	PECAM1	PECAM1
kgp9700727	17	62406985	PECAM1	PECAM1
rs7220554	17	62407007	PECAM1	PECAM1
kgp4150916	17	62407030	PECAM1	PECAM1
kgp14427918	2	113531514	IL1A	IL1A
kgp8836911	2	113531947	IL1A	IL1A
kgp14722386	2	113531955	IL1A	IL1A
kgp10419891	2	113532083	IL1A	IL1A
kgp6417740	2	113532236	IL1A	IL1A
rs3783588	2	113532647	IL1A	IL1A
kgp9561721	2	113532885	IL1A	IL1A
kgp11469138	2	113533845	IL1A	IL1A
rs2856842	2	113534254	IL1A	IL1A
kgp4737481	2	113535395	IL1A	IL1A
rs2071375	2	113535438	IL1A	IL1A
kgp14985204	2	113536440	IL1A	IL1A
kgp24613191	2	113536635	IL1A	IL1A
kgp14640696	2	113536956	IL1A	IL1A
kgp14870523	2	113537151	IL1A	IL1A
rs17562	2	113537190	IL1A	IL1A
rs17561	2	113537223	IL1A	IL1A
rs2856841	2	113537339	IL1A	IL1A
kgp10794560	2	113538194	IL1A	IL1A
rs3783538	2	113538195	IL1A	IL1A
kgp11313314	2	113538195	IL1A	IL1A
rs1533463	2	113538782	IL1A	IL1A
kgp14211703	2	113539224	IL1A	IL1A
rs3783531	2	113539246	IL1A	IL1A
kgp14261256	2	113539500	IL1A	IL1A
rs3783575	2	113539873	IL1A	IL1A
kgp1494113	2	113539972	IL1A	IL1A
rs2071373	2	113540084	IL1A	IL1A
rs1894399	2	113540177	IL1A	IL1A
rs1609682	2	113540205	IL1A	IL1A
rs3783573	2	113540413	IL1A	IL1A
rs3783572	2	113541382	IL1A	IL1A
rs2856837	2	113541925	IL1A	IL1A
kgp14441102	2	113542718	IL1A	IL1A
rs1800587	2	113542960	IL1A	IL1A
kgp14869059	2	113542969	IL1A	IL1A
kgp11941522	20	44637624	MMP9	MMP9
kgp27957299	20	44637635	MMP9	MMP9
kgp12148805	20	44638781	MMP9	MMP9
kgp6976865	20	44639511	MMP9	MMP9
kgp5769392	20	44639599	MMP9	MMP9
rs2274755	20	44639692	MMP9	MMP9
kgp19329224	20	44639848	MMP9	MMP9
kgp28005617	20	44639905	MMP9	MMP9
kgp12354347	20	44640139	MMP9	MMP9
rs17576	20	44640225	MMP9	MMP9
kgp19175107	20	44640229	MMP9	MMP9
rs3918254	20	44640391	MMP9	MMP9
rs2236416	20	44640575	MMP9	MMP9
kgp5341585	20	44640959	MMP9	MMP9
rs2250889	20	44642406	MMP9	MMP9
rs3918260	20	44642532	MMP9	MMP9
rs2274756	20	44643111	MMP9	MMP9
kgp878501	20	44643111	MMP9	MMP9
rs3918261	20	44643592	MMP9	MMP9
rs3918262	20	44643770	MMP9	MMP9
kgp11560023	20	44643789	MMP9	MMP9
rs3918282	20	44644709	MMP9	MMP9
kgp19283204	20	44644905	MMP9	MMP9
kgp27887714	20	44644927	MMP9	MMP9
kgp5474569	20	44644965	MMP9	MMP9
GA017205	20	44645010	MMP9	MMP9
kgp2266426	20	44645153	MMP9	MMP9
kgp3941826	22	39619814	PDGFB,PDGFB	PDGFB
kgp7792367	22	39619897	PDGFB,PDGFB	PDGFB
kgp7535083	22	39620002	PDGFB,PDGFB	PDGFB
kgp24711165	22	39620175	PDGFB,PDGFB	PDGFB
kgp15118571	22	39620265	PDGFB,PDGFB	PDGFB
kgp15035539	22	39620628	PDGFB,PDGFB	PDGFB
kgp24661762	22	39620641	PDGFB,PDGFB	PDGFB
kgp15034273	22	39620928	PDGFB,PDGFB	PDGFB
kgp4491970	22	39620979	PDGFB,PDGFB	PDGFB
kgp15096362	22	39620980	PDGFB,PDGFB	PDGFB
kgp15016476	22	39621073	PDGFB,PDGFB	PDGFB
kgp14999229	22	39621081	PDGFB,PDGFB	PDGFB
kgp15057879	22	39621342	PDGFB,PDGFB	PDGFB
kgp15066179	22	39621797	PDGFB,PDGFB	PDGFB
kgp1675472	22	39622096	PDGFB,PDGFB	PDGFB
kgp9789603	22	39622939	PDGFB,PDGFB	PDGFB
rs4990919	22	39622940	PDGFB,PDGFB	PDGFB
kgp15025873	22	39623558	PDGFB,PDGFB	PDGFB
rs4416326	22	39623725	PDGFB,PDGFB	PDGFB
kgp15115979	22	39623888	PDGFB,PDGFB	PDGFB
rs9611117	22	39624105	PDGFB,PDGFB	PDGFB
rs5757570	22	39624238	PDGFB,PDGFB	PDGFB
rs9622978	22	39625068	PDGFB,PDGFB	PDGFB
kgp14987033	22	39625726	PDGFB,PDGFB	PDGFB
kgp10124996	22	39626375	PDGFB,PDGFB	PDGFB
kgp12146425	22	39626419	PDGFB,PDGFB	PDGFB
kgp130252	22	39626542	PDGFB,PDGFB	PDGFB
kgp9865762	22	39626572	PDGFB,PDGFB	PDGFB
kgp3387008	22	39626823	PDGFB,PDGFB	PDGFB
kgp1692120	22	39627077	PDGFB,PDGFB	PDGFB
kgp24636089	22	39627821	PDGFB,PDGFB	PDGFB
rs4821877	22	39629096	PDGFB,PDGFB	PDGFB
rs11704525	22	39629329	PDGFB,PDGFB	PDGFB
kgp15028423	22	39629418	PDGFB,PDGFB	PDGFB
kgp4475735	22	39629561	PDGFB,PDGFB	PDGFB
kgp1811854	22	39629854	PDGFB,PDGFB	PDGFB
rs2247128	22	39630287	PDGFB,PDGFB	PDGFB
kgp15030641	22	39631462	PDGFB,PDGFB	PDGFB
rs879180	22	39631547	PDGFB,PDGFB	PDGFB
kgp15043680	22	39631747	PDGFB,PDGFB	PDGFB
kgp5511870	22	39631768	PDGFB,PDGFB	PDGFB
kgp24671230	22	39632497	PDGFB,PDGFB	PDGFB
kgp11533722	22	39632931	PDGFB,PDGFB	PDGFB
kgp11153522	22	39633479	PDGFB,PDGFB	PDGFB
rs5757573	22	39633622	PDGFB,PDGFB	PDGFB
rs2267406	22	39633749	PDGFB,PDGFB	PDGFB
kgp7366403	22	39634923	PDGFB,PDGFB	PDGFB
kgp24656071	22	39636853	PDGFB,PDGFB	PDGFB
kgp10540008	22	39639225	PDGFB	PDGFB
kgp410560	4	55944618	KDR	KDR
kgp21321762	4	55944651	KDR	KDR
kgp21100828	4	55944837	KDR	KDR
kgp5375217	4	55944842	KDR	KDR
kgp5457229	4	55944891	KDR	KDR
kgp21009406	4	55945603	KDR	KDR
kgp29077959	4	55945677	KDR	KDR
kgp11516920	4	55946081	KDR	KDR
kgp9143262	4	55946171	KDR	KDR
kgp278122	4	55946354	KDR	KDR
kgp9855605	4	55947155	KDR	KDR
rs4864952	4	55947338	KDR	KDR
kgp5992784	4	55948108	KDR	KDR
kgp2110792	4	55949546	KDR	KDR
kgp1176080	4	55950161	KDR	KDR
kgp20652592	4	55951137	KDR	KDR
kgp6911174	4	55951300	KDR	KDR
kgp8653909	4	55951823	KDR	KDR
kgp20700559	4	55951886	KDR	KDR
kgp12164709	4	55952181	KDR	KDR
kgp1060670	4	55952299	KDR	KDR
kgp4415222	4	55952406	KDR	KDR
kgp29055578	4	55952454	KDR	KDR
kgp7227395	4	55953380	KDR	KDR
kgp20882189	4	55953407	KDR	KDR
rs2125489	4	55953483	KDR	KDR
kgp29444264	4	55953923	KDR	KDR
kgp4002872	4	55954379	KDR	KDR
kgp21140936	4	55954408	KDR	KDR
kgp6934108	4	55955023	KDR	KDR
rs1531289	4	55955232	KDR	KDR
kgp20885732	4	55956225	KDR	KDR
rs17709898	4	55957723	KDR	KDR
kgp6181948	4	55958240	KDR	KDR
kgp9331815	4	55959862	KDR	KDR
kgp20674571	4	55959914	KDR	KDR
kgp2886643	4	55959922	KDR	KDR
kgp29394117	4	55959966	KDR	KDR
kgp21168443	4	55960881	KDR	KDR
rs13129474	4	55961086	KDR	KDR
kgp21224993	4	55961103	KDR	KDR
rs2219471	4	55961159	KDR	KDR
kgp2783626	4	55961221	KDR	KDR
kgp21150921	4	55961873	KDR	KDR
kgp6029191	4	55961890	KDR	KDR
kgp7298833	4	55962166	KDR	KDR
kgp20634290	4	55962358	KDR	KDR
kgp21270623	4	55962613	KDR	KDR
kgp20911696	4	55963599	KDR	KDR
rs6838752	4	55964101	KDR	KDR
kgp21294916	4	55964373	KDR	KDR
kgp4935169	4	55964565	KDR	KDR
kgp20811705	4	55964835	KDR	KDR
rs1870378	4	55966453	KDR	KDR
kgp2423516	4	55966573	KDR	KDR
kgp12164233	4	55966759	KDR	KDR
rs6828477	4	55966801	KDR	KDR
kgp41706	4	55966898	KDR	KDR
rs2168945	4	55967483	KDR	KDR
kgp6857767	4	55968053	KDR	KDR
kgp29037829	4	55968597	KDR	KDR
kgp6843852	4	55968820	KDR	KDR
kgp20684964	4	55969316	KDR	KDR
kgp10216955	4	55970083	KDR	KDR
rs11732292	4	55970101	KDR	KDR
kgp21217629	4	55970782	KDR	KDR
kgp21277336	4	55970853	KDR	KDR
kgp21257210	4	55970963	KDR	KDR
kgp20867888	4	55971241	KDR	KDR
kgp21004047	4	55971388	KDR	KDR
kgp20695838	4	55972048	KDR	KDR
kgp7485533	4	55972946	KDR	KDR
rs1870377	4	55972974	KDR	KDR
kgp21315586	4	55973676	KDR	KDR
kgp20907707	4	55974095	KDR	KDR
kgp5372419	4	55974648	KDR	KDR
kgp7749037	4	55974866	KDR	KDR
kgp12198190	4	55975719	KDR	KDR
kgp1728715	4	55976168	KDR	KDR
kgp4501538	4	55976451	KDR	KDR
rs2034964	4	55976651	KDR	KDR
kgp10459419	4	55976942	KDR	KDR
kgp2280772	4	55977376	KDR	KDR
kgp21003996	4	55977428	KDR	KDR
kgp10767898	4	55977759	KDR	KDR
kgp3434955	4	55977800	KDR	KDR
kgp11919005	4	55977866	KDR	KDR
kgp10880629	4	55977961	KDR	KDR
kgp1609961	4	55978160	KDR	KDR
rs11941492	4	55978210	KDR	KDR
kgp3896309	4	55979070	KDR	KDR
rs2305948	4	55979558	KDR	KDR
kgp29038632	4	55979786	KDR	KDR
rs7692791	4	55980239	KDR	KDR
kgp10448138	4	55980456	KDR	KDR
kgp21162595	4	55981531	KDR	KDR
rs11133360	4	55982752	KDR	KDR
kgp1786876	4	55982784	KDR	KDR
kgp10486165	4	55983260	KDR	KDR
kgp9796218	4	55984908	KDR	KDR
kgp21243999	4	55984925	KDR	KDR
kgp29501445	4	55984986	KDR	KDR
rs6837735	4	55985815	KDR	KDR
kgp11008629	4	55986238	KDR	KDR
kgp2408149	4	55986562	KDR	KDR
kgp5629045	4	55987002	KDR	KDR
kgp20636156	4	55987223	KDR	KDR
kgp20967814	4	55987393	KDR	KDR
kgp29418388	4	55987417	KDR	KDR
kgp1634375	4	55987714	KDR	KDR
kgp29135405	4	55987778	KDR	KDR
kgp11268728	4	55989361	KDR	KDR
kgp5941942	4	55989661	KDR	KDR
kgp11055967	4	55990353	KDR	KDR
kgp750091	4	55990484	KDR	KDR
rs12502008	4	55991042	KDR	KDR
kgp4951997	4	55991731	KDR	KDR
kgp6621464	4	123748524	FGF2	FGF2
kgp21184699	4	123748532	FGF2	FGF2
rs1992980	4	123749237	FGF2	FGF2
kgp2569640	4	123749552	FGF2	FGF2
kgp4609354	4	123749974	FGF2	FGF2
kgp341564	4	123751064	FGF2	FGF2
kgp519529	4	123751737	FGF2	FGF2
kgp550083	4	123751996	FGF2	FGF2
rs308412	4	123752017	FGF2	FGF2
rs308411	4	123752347	FGF2	FGF2
kgp10481773	4	123752593	FGF2	FGF2
kgp12007964	4	123752619	FGF2	FGF2
kgp20718149	4	123752660	FGF2	FGF2
kgp8648145	4	123752675	FGF2	FGF2
kgp2773283	4	123754115	FGF2	FGF2
kgp9916740	4	123757031	FGF2	FGF2
kgp9864064	4	123757034	FGF2	FGF2
kgp6105971	4	123757748	FGF2	FGF2
kgp1831677	4	123757889	FGF2	FGF2
rs308402	4	123757988	FGF2	FGF2
kgp9376778	4	123757994	FGF2	FGF2
kgp2421877	4	123758621	FGF2	FGF2
kgp29472829	4	123759138	FGF2	FGF2
kgp10317375	4	123759856	FGF2	FGF2
kgp1496767	4	123759991	FGF2	FGF2
kgp10337441	4	123760689	FGF2	FGF2
kgp20982779	4	123761641	FGF2	FGF2
kgp12281834	4	123762030	FGF2	FGF2
kgp9812941	4	123763901	FGF2	FGF2
kgp29015565	4	123764234	FGF2	FGF2
kgp7505379	4	123764458	FGF2	FGF2
kgp6619268	4	123764508	FGF2	FGF2
rs308427	4	123764791	FGF2	FGF2
kgp21055964	4	123767758	FGF2	FGF2
rs308420	4	123767943	FGF2	FGF2
kgp11922948	4	123768263	FGF2	FGF2
kgp2795616	4	123768957	FGF2	FGF2
kgp410428	4	123769053	FGF2	FGF2
kgp20710715	4	123769285	FGF2	FGF2
kgp21016615	4	123769555	FGF2	FGF2
kgp20893166	4	123769816	FGF2	FGF2
kgp29391720	4	123770867	FGF2	FGF2
kgp21271680	4	123771548	FGF2	FGF2
rs308434	4	123771828	FGF2	FGF2
kgp10083837	4	123771995	FGF2	FGF2
rs308435	4	123772018	FGF2	FGF2
kgp20801996	4	123772304	FGF2	FGF2
rs11938826	4	123772614	FGF2	FGF2
kgp29308919	4	123772660	FGF2	FGF2
rs308438	4	123772887	FGF2	FGF2
kgp7677534	4	123773439	FGF2	FGF2
rs308439	4	123773579	FGF2	FGF2
kgp7875056	4	123773814	FGF2	FGF2
rs308441	4	123774065	FGF2	FGF2
kgp1710944	4	123774110	FGF2	FGF2
rs17472986	4	123774832	FGF2	FGF2
kgp12047009	4	123774956	FGF2	FGF2
kgp6269175	4	123775377	FGF2	FGF2
kgp3588521	4	123775433	FGF2	FGF2
kgp11683297	4	123775594	FGF2	FGF2
rs308443	4	123775767	FGF2	FGF2
kgp20913864	4	123776398	FGF2	FGF2
kgp6574755	4	123776400	FGF2	FGF2
kgp6880528	4	123776531	FGF2	FGF2
kgp11640693	4	123777869	FGF2	FGF2
kgp2417854	4	123778052	FGF2	FGF2
kgp4182311	4	123778273	FGF2	FGF2
rs17407577	4	123779341	FGF2	FGF2
kgp1459384	4	123780587	FGF2	FGF2
kgp7769959	4	123780830	FGF2	FGF2
kgp21269195	4	123780832	FGF2	FGF2
kgp11559855	4	123781418	FGF2	FGF2
kgp3488468	4	123782341	FGF2	FGF2
rs1960669	4	123782568	FGF2	FGF2
kgp6607603	4	123782896	FGF2	FGF2
kgp441064	4	123783105	FGF2	FGF2
kgp11583985	4	123783194	FGF2	FGF2
kgp20829468	4	123783216	FGF2	FGF2
kgp1908672	4	123784389	FGF2	FGF2
kgp8911967	4	123785184	FGF2	FGF2
kgp9977810	4	123785448	FGF2	FGF2
rs308388	4	123787079	FGF2	FGF2
kgp21173628	4	123787657	FGF2	FGF2
kgp10705731	4	123787692	FGF2	FGF2
kgp11408518	4	123788375	FGF2	FGF2
rs7694627	4	123788495	FGF2	FGF2
kgp2626658	4	123788641	FGF2	FGF2
kgp1593075	4	123789238	FGF2	FGF2
kgp1600184	4	123794752	FGF2	FGF2
rs17006247	4	123797183	FGF2	FGF2
kgp12098406	4	123797428	FGF2	FGF2
kgp20799325	4	123797604	FGF2	FGF2
kgp75714	4	123797982	FGF2	FGF2
kgp8815753	4	123798810	FGF2	FGF2
rs17006255	4	123798993	FGF2	FGF2
rs10028204	4	123799987	FGF2	FGF2
rs17408557	4	123800617	FGF2	FGF2
rs12506776	4	123803370	FGF2	FGF2
kgp10052664	4	123803912	FGF2	FGF2
kgp3088917	4	123804549	FGF2	FGF2
kgp12380664	4	123804642	FGF2	FGF2
kgp5768041	4	123806008	FGF2	FGF2
kgp6696682	4	123808642	FGF2	FGF2
kgp29348615	4	123809959	FGF2	FGF2
rs10452197	4	123810328	FGF2	FGF2
kgp5665988	4	123810669	FGF2	FGF2
kgp20868608	4	123811111	FGF2	FGF2
kgp21157417	4	123811693	FGF2	FGF2
kgp8633222	4	123812881	FGF2	FGF2
kgp1070591	4	123813009	FGF2	FGF2
rs3804156	4	123813655	FGF2	FGF2
kgp9374353	4	123813719	FGF2	FGF2
rs1048201	4	123814308	FGF2,NUDT6,NUDT6	FGF2
kgp21300815	4	123814385	FGF2,NUDT6,NUDT6	FGF2
rs3804158	4	123814900	FGF2,NUDT6,NUDT6	FGF2
kgp2049483	4	123815018	FGF2,NUDT6,NUDT6	FGF2
kgp21145777	4	123815081	FGF2,NUDT6,NUDT6	FGF2
kgp21184912	4	123815302	FGF2,NUDT6,NUDT6	FGF2
kgp10040738	4	123815363	FGF2,NUDT6,NUDT6	FGF2
kgp20973656	4	123815856	FGF2,NUDT6,NUDT6	FGF2
kgp1878481	4	123816022	FGF2,NUDT6,NUDT6	FGF2
kgp7802909	4	123816124	FGF2,NUDT6,NUDT6	FGF2
kgp4384301	4	123816291	FGF2,NUDT6,NUDT6	FGF2
kgp3059395	4	123816317	FGF2,NUDT6,NUDT6	FGF2
kgp1797688	4	123816638	FGF2,NUDT6,NUDT6	FGF2
kgp9097592	4	123816707	FGF2,NUDT6,NUDT6	FGF2
kgp21125604	4	123816793	FGF2,NUDT6,NUDT6	FGF2
kgp29127963	4	123817007	FGF2,NUDT6,NUDT6	FGF2
kgp5315185	4	123817175	FGF2,NUDT6,NUDT6	FGF2
kgp9573684	4	123817222	FGF2,NUDT6,NUDT6	FGF2
kgp20879511	4	123817253	FGF2,NUDT6,NUDT6	FGF2
kgp20866897	4	123817482	FGF2,NUDT6,NUDT6	FGF2
kgp6438668	4	123817528	FGF2,NUDT6,NUDT6	FGF2
kgp29485771	4	123817592	FGF2,NUDT6,NUDT6	FGF2
kgp21281157	4	123817886	FGF2,NUDT6,NUDT6	FGF2
rs3747676	4	123818074	FGF2,NUDT6,NUDT6	FGF2
kgp7387263	4	123818085	FGF2,NUDT6,NUDT6	FGF2
kgp10516114	4	123818140	FGF2,NUDT6,NUDT6	FGF2
kgp86914	4	123818247	FGF2,NUDT6,NUDT6	FGF2
kgp5150013	4	123818511	FGF2,NUDT6,NUDT6	FGF2
kgp2820578	4	123818556	FGF2,NUDT6,NUDT6	FGF2
kgp10045653	4	123818633	FGF2,NUDT6,NUDT6	FGF2
kgp21299213	4	123819013	FGF2,NUDT6,NUDT6	FGF2
kgp21173617	4	123819040	FGF2,NUDT6,NUDT6	FGF2
GA005834	6	43738350	VEGFA,VEGFA,VEGFA,VEGFA,VEGFA,VEGFA,VEGFA,VEGFA,VEGFA,VEGFA,VEGFA,VEGFA,VEGFA,VEGFA,VEGFA,VEGFA,VEGFA,VEGFA	VEGFA
rs25648	6	43738977	VEGFA,VEGFA,VEGFA,VEGFA,VEGFA,VEGFA,VEGFA,VEGFA,VEGFA,VEGFA,VEGFA,VEGFA,VEGFA,VEGFA,VEGFA,VEGFA,VEGFA,VEGFA	VEGFA
kgp881936	6	43739327	VEGFA,VEGFA,VEGFA,VEGFA,VEGFA,VEGFA,VEGFA,VEGFA,VEGFA,VEGFA,VEGFA,VEGFA,VEGFA,VEGFA,VEGFA,VEGFA,VEGFA,VEGFA	VEGFA
kgp10944836	6	43739446	VEGFA,VEGFA,VEGFA,VEGFA,VEGFA,VEGFA,VEGFA,VEGFA,VEGFA,VEGFA,VEGFA,VEGFA,VEGFA,VEGFA,VEGFA,VEGFA,VEGFA,VEGFA	VEGFA
kgp2656646	6	43739989	VEGFA,VEGFA,VEGFA,VEGFA,VEGFA,VEGFA,VEGFA,VEGFA,VEGFA,VEGFA,VEGFA,VEGFA,VEGFA,VEGFA,VEGFA,VEGFA,VEGFA,VEGFA	VEGFA
kgp17366122	6	43740020	VEGFA,VEGFA,VEGFA,VEGFA,VEGFA,VEGFA,VEGFA,VEGFA,VEGFA,VEGFA,VEGFA,VEGFA,VEGFA,VEGFA,VEGFA,VEGFA,VEGFA,VEGFA	VEGFA
kgp5403433	6	43740094	VEGFA,VEGFA,VEGFA,VEGFA,VEGFA,VEGFA,VEGFA,VEGFA,VEGFA,VEGFA,VEGFA,VEGFA,VEGFA,VEGFA,VEGFA,VEGFA,VEGFA,VEGFA	VEGFA
kgp8742852	6	43740840	VEGFA,VEGFA,VEGFA,VEGFA,VEGFA,VEGFA,VEGFA,VEGFA,VEGFA,VEGFA,VEGFA,VEGFA,VEGFA,VEGFA,VEGFA,VEGFA,VEGFA,VEGFA	VEGFA
kgp12537115	6	43741201	VEGFA,VEGFA,VEGFA,VEGFA,VEGFA,VEGFA,VEGFA,VEGFA,VEGFA,VEGFA,VEGFA,VEGFA,VEGFA,VEGFA,VEGFA,VEGFA,VEGFA,VEGFA	VEGFA
rs3025042	6	43741451	VEGFA,VEGFA,VEGFA,VEGFA,VEGFA,VEGFA,VEGFA,VEGFA,VEGFA,VEGFA,VEGFA,VEGFA,VEGFA,VEGFA,VEGFA,VEGFA,VEGFA,VEGFA	VEGFA
rs833068	6	43742527	VEGFA,VEGFA,VEGFA,VEGFA,VEGFA,VEGFA,VEGFA,VEGFA,VEGFA,VEGFA,VEGFA,VEGFA,VEGFA,VEGFA,VEGFA,VEGFA,VEGFA,VEGFA	VEGFA
rs833069	6	43742579	VEGFA,VEGFA,VEGFA,VEGFA,VEGFA,VEGFA,VEGFA,VEGFA,VEGFA,VEGFA,VEGFA,VEGFA,VEGFA,VEGFA,VEGFA,VEGFA,VEGFA,VEGFA	VEGFA
rs833070	6	43742626	VEGFA,VEGFA,VEGFA,VEGFA,VEGFA,VEGFA,VEGFA,VEGFA,VEGFA,VEGFA,VEGFA,VEGFA,VEGFA,VEGFA,VEGFA,VEGFA,VEGFA,VEGFA	VEGFA
kgp17195848	6	43743303	VEGFA,VEGFA,VEGFA,VEGFA,VEGFA,VEGFA,VEGFA,VEGFA,VEGFA,VEGFA,VEGFA,VEGFA,VEGFA,VEGFA,VEGFA,VEGFA,VEGFA,VEGFA	VEGFA
rs3024994	6	43743507	VEGFA,VEGFA,VEGFA,VEGFA,VEGFA,VEGFA,VEGFA,VEGFA,VEGFA,VEGFA,VEGFA,VEGFA,VEGFA,VEGFA,VEGFA,VEGFA,VEGFA,VEGFA	VEGFA
rs735286	6	43744621	VEGFA,VEGFA,VEGFA,VEGFA,VEGFA,VEGFA,VEGFA,VEGFA,VEGFA,VEGFA,VEGFA,VEGFA,VEGFA,VEGFA,VEGFA,VEGFA,VEGFA,VEGFA	VEGFA
rs2146323	6	43745095	VEGFA,VEGFA,VEGFA,VEGFA,VEGFA,VEGFA,VEGFA,VEGFA,VEGFA,VEGFA,VEGFA,VEGFA,VEGFA,VEGFA,VEGFA,VEGFA,VEGFA,VEGFA	VEGFA
rs3024997	6	43745107	VEGFA,VEGFA,VEGFA,VEGFA,VEGFA,VEGFA,VEGFA,VEGFA,VEGFA,VEGFA,VEGFA,VEGFA,VEGFA,VEGFA,VEGFA,VEGFA,VEGFA,VEGFA	VEGFA
kgp26467217	6	43745193	VEGFA,VEGFA,VEGFA,VEGFA,VEGFA,VEGFA,VEGFA,VEGFA,VEGFA,VEGFA,VEGFA,VEGFA,VEGFA,VEGFA,VEGFA,VEGFA,VEGFA,VEGFA	VEGFA
rs3024998	6	43745577	VEGFA,VEGFA,VEGFA,VEGFA,VEGFA,VEGFA,VEGFA,VEGFA,VEGFA,VEGFA,VEGFA,VEGFA,VEGFA,VEGFA,VEGFA,VEGFA,VEGFA,VEGFA	VEGFA
kgp11786403	6	43746169	VEGFA,VEGFA,VEGFA,VEGFA,VEGFA,VEGFA,VEGFA,VEGFA,VEGFA,VEGFA,VEGFA,VEGFA,VEGFA,VEGFA,VEGFA,VEGFA,VEGFA,VEGFA	VEGFA
GA023950	6	43746274	VEGFA,VEGFA,VEGFA,VEGFA,VEGFA,VEGFA,VEGFA,VEGFA,VEGFA,VEGFA,VEGFA,VEGFA,VEGFA,VEGFA,VEGFA,VEGFA,VEGFA,VEGFA	VEGFA
kgp17323734	6	43746329	VEGFA,VEGFA,VEGFA,VEGFA,VEGFA,VEGFA,VEGFA,VEGFA,VEGFA,VEGFA,VEGFA,VEGFA,VEGFA,VEGFA,VEGFA,VEGFA,VEGFA,VEGFA	VEGFA
kgp7044318	6	43746410	VEGFA,VEGFA,VEGFA,VEGFA,VEGFA,VEGFA,VEGFA,VEGFA,VEGFA,VEGFA,VEGFA,VEGFA,VEGFA,VEGFA,VEGFA,VEGFA,VEGFA,VEGFA	VEGFA
rs3025048	6	43746423	VEGFA,VEGFA,VEGFA,VEGFA,VEGFA,VEGFA,VEGFA,VEGFA,VEGFA,VEGFA,VEGFA,VEGFA,VEGFA,VEGFA,VEGFA,VEGFA,VEGFA,VEGFA	VEGFA
kgp11861784	6	43746949	VEGFA,VEGFA,VEGFA,VEGFA,VEGFA,VEGFA,VEGFA,VEGFA,VEGFA,VEGFA,VEGFA,VEGFA,VEGFA,VEGFA,VEGFA,VEGFA,VEGFA,VEGFA	VEGFA
kgp10500630	6	43747248	VEGFA,VEGFA,VEGFA,VEGFA,VEGFA,VEGFA,VEGFA,VEGFA,VEGFA,VEGFA,VEGFA,VEGFA,VEGFA,VEGFA,VEGFA,VEGFA,VEGFA,VEGFA	VEGFA
kgp9815473	6	43747371	VEGFA,VEGFA,VEGFA,VEGFA,VEGFA,VEGFA,VEGFA,VEGFA,VEGFA,VEGFA,VEGFA,VEGFA,VEGFA,VEGFA,VEGFA,VEGFA,VEGFA,VEGFA	VEGFA
rs3025049	6	43747378	VEGFA,VEGFA,VEGFA,VEGFA,VEGFA,VEGFA,VEGFA,VEGFA,VEGFA,VEGFA,VEGFA,VEGFA,VEGFA,VEGFA,VEGFA,VEGFA,VEGFA,VEGFA	VEGFA
kgp8040462	6	43747450	VEGFA,VEGFA,VEGFA,VEGFA,VEGFA,VEGFA,VEGFA,VEGFA,VEGFA,VEGFA,VEGFA,VEGFA,VEGFA,VEGFA,VEGFA,VEGFA,VEGFA,VEGFA	VEGFA
rs3025010	6	43747577	VEGFA,VEGFA,VEGFA,VEGFA,VEGFA,VEGFA,VEGFA,VEGFA,VEGFA,VEGFA,VEGFA,VEGFA,VEGFA,VEGFA,VEGFA,VEGFA,VEGFA,VEGFA	VEGFA
kgp5518709	6	43747962	VEGFA,VEGFA,VEGFA,VEGFA,VEGFA,VEGFA,VEGFA,VEGFA,VEGFA,VEGFA,VEGFA,VEGFA,VEGFA,VEGFA,VEGFA,VEGFA,VEGFA,VEGFA	VEGFA
rs3025015	6	43748350	VEGFA,VEGFA,VEGFA,VEGFA,VEGFA,VEGFA,VEGFA,VEGFA,VEGFA,VEGFA,VEGFA,VEGFA,VEGFA,VEGFA,VEGFA,VEGFA,VEGFA,VEGFA	VEGFA
rs3025051	6	43748439	VEGFA,VEGFA,VEGFA,VEGFA,VEGFA,VEGFA,VEGFA,VEGFA,VEGFA,VEGFA,VEGFA,VEGFA,VEGFA,VEGFA,VEGFA,VEGFA,VEGFA,VEGFA	VEGFA
kgp9877453	6	43748643	VEGFA,VEGFA,VEGFA,VEGFA,VEGFA,VEGFA,VEGFA,VEGFA,VEGFA,VEGFA,VEGFA,VEGFA,VEGFA,VEGFA,VEGFA,VEGFA,VEGFA,VEGFA	VEGFA
kgp7209735	6	43748845	VEGFA,VEGFA,VEGFA,VEGFA,VEGFA,VEGFA,VEGFA,VEGFA,VEGFA,VEGFA,VEGFA,VEGFA,VEGFA,VEGFA,VEGFA,VEGFA,VEGFA,VEGFA	VEGFA
rs3025019	6	43748986	VEGFA,VEGFA,VEGFA,VEGFA,VEGFA,VEGFA,VEGFA,VEGFA,VEGFA,VEGFA,VEGFA,VEGFA,VEGFA,VEGFA,VEGFA,VEGFA,VEGFA,VEGFA	VEGFA
kgp6673901	6	43749110	VEGFA,VEGFA,VEGFA,VEGFA,VEGFA,VEGFA,VEGFA,VEGFA,VEGFA,VEGFA,VEGFA,VEGFA,VEGFA,VEGFA,VEGFA,VEGFA,VEGFA,VEGFA	VEGFA
kgp4263423	6	43749163	VEGFA,VEGFA,VEGFA,VEGFA,VEGFA,VEGFA,VEGFA,VEGFA,VEGFA,VEGFA,VEGFA,VEGFA,VEGFA,VEGFA,VEGFA,VEGFA,VEGFA,VEGFA	VEGFA
kgp4341913	6	43749230	VEGFA,VEGFA,VEGFA,VEGFA,VEGFA,VEGFA,VEGFA,VEGFA,VEGFA,VEGFA,VEGFA,VEGFA,VEGFA,VEGFA,VEGFA,VEGFA,VEGFA,VEGFA	VEGFA
kgp26318745	6	43750313	VEGFA,VEGFA,VEGFA,VEGFA,VEGFA,VEGFA,VEGFA,VEGFA,VEGFA,VEGFA,VEGFA,VEGFA,VEGFA,VEGFA,VEGFA,VEGFA,VEGFA,VEGFA	VEGFA
rs3025028	6	43750551	VEGFA,VEGFA,VEGFA,VEGFA,VEGFA,VEGFA,VEGFA,VEGFA,VEGFA,VEGFA,VEGFA,VEGFA,VEGFA,VEGFA,VEGFA,VEGFA,VEGFA,VEGFA	VEGFA
rs3025029	6	43750556	VEGFA,VEGFA,VEGFA,VEGFA,VEGFA,VEGFA,VEGFA,VEGFA,VEGFA,VEGFA,VEGFA,VEGFA,VEGFA,VEGFA,VEGFA,VEGFA,VEGFA,VEGFA	VEGFA
rs3025030	6	43750587	VEGFA,VEGFA,VEGFA,VEGFA,VEGFA,VEGFA,VEGFA,VEGFA,VEGFA,VEGFA,VEGFA,VEGFA,VEGFA,VEGFA,VEGFA,VEGFA,VEGFA,VEGFA	VEGFA
kgp9319879	6	43751037	VEGFA,VEGFA,VEGFA,VEGFA,VEGFA,VEGFA,VEGFA,VEGFA,VEGFA,VEGFA,VEGFA,VEGFA,VEGFA,VEGFA,VEGFA,VEGFA,VEGFA,VEGFA	VEGFA
kgp8432034	6	43751075	VEGFA,VEGFA,VEGFA,VEGFA,VEGFA,VEGFA,VEGFA,VEGFA,VEGFA,VEGFA,VEGFA,VEGFA,VEGFA,VEGFA,VEGFA,VEGFA,VEGFA,VEGFA	VEGFA
rs3025035	6	43751359	VEGFA,VEGFA,VEGFA,VEGFA,VEGFA,VEGFA,VEGFA,VEGFA,VEGFA,VEGFA,VEGFA,VEGFA,VEGFA,VEGFA,VEGFA,VEGFA,VEGFA,VEGFA	VEGFA
kgp8460038	6	43751669	VEGFA,VEGFA,VEGFA,VEGFA,VEGFA,VEGFA,VEGFA,VEGFA,VEGFA,VEGFA,VEGFA,VEGFA,VEGFA,VEGFA,VEGFA,VEGFA,VEGFA,VEGFA	VEGFA
rs715843	6	43752224	VEGFA,VEGFA,VEGFA,VEGFA,VEGFA,VEGFA,VEGFA,VEGFA,VEGFA,VEGFA,VEGFA,VEGFA,VEGFA,VEGFA,VEGFA,VEGFA,VEGFA,VEGFA	VEGFA
kgp26183013	6	43752503	VEGFA,VEGFA,VEGFA,VEGFA,VEGFA,VEGFA,VEGFA,VEGFA,VEGFA,VEGFA,VEGFA,VEGFA,VEGFA,VEGFA,VEGFA,VEGFA,VEGFA,VEGFA	VEGFA
rs3025039	6	43752536	VEGFA,VEGFA,VEGFA,VEGFA,VEGFA,VEGFA,VEGFA,VEGFA,VEGFA,VEGFA,VEGFA,VEGFA,VEGFA,VEGFA,VEGFA,VEGFA,VEGFA,VEGFA	VEGFA
kgp128160	6	43753051	VEGFA,VEGFA,VEGFA,VEGFA,VEGFA,VEGFA,VEGFA,VEGFA,VEGFA,VEGFA,VEGFA,VEGFA,VEGFA,VEGFA,VEGFA,VEGFA,VEGFA,VEGFA	VEGFA
kgp16994975	6	43753137	VEGFA,VEGFA,VEGFA,VEGFA,VEGFA,VEGFA,VEGFA,VEGFA,VEGFA,VEGFA,VEGFA,VEGFA,VEGFA,VEGFA,VEGFA,VEGFA,VEGFA,VEGFA	VEGFA
rs10434	6	43753212	VEGFA,VEGFA,VEGFA,VEGFA,VEGFA,VEGFA,VEGFA,VEGFA,VEGFA,VEGFA,VEGFA,VEGFA,VEGFA,VEGFA,VEGFA,VEGFA,VEGFA,VEGFA	VEGFA
kgp17145380	6	43753276	VEGFA,VEGFA,VEGFA,VEGFA,VEGFA,VEGFA,VEGFA,VEGFA,VEGFA,VEGFA,VEGFA,VEGFA,VEGFA,VEGFA,VEGFA,VEGFA,VEGFA,VEGFA	VEGFA
rs3025053	6	43753325	VEGFA,VEGFA,VEGFA,VEGFA,VEGFA,VEGFA,VEGFA,VEGFA,VEGFA,VEGFA,VEGFA,VEGFA,VEGFA,VEGFA,VEGFA,VEGFA,VEGFA,VEGFA	VEGFA
kgp1918352	6	43753722	VEGFA,VEGFA,VEGFA,VEGFA,VEGFA,VEGFA,VEGFA,VEGFA,VEGFA,VEGFA,VEGFA,VEGFA,VEGFA,VEGFA,VEGFA,VEGFA,VEGFA,VEGFA	VEGFA
kgp17251844	6	43753788	VEGFA,VEGFA,VEGFA,VEGFA,VEGFA,VEGFA,VEGFA,VEGFA,VEGFA,VEGFA,VEGFA,VEGFA,VEGFA,VEGFA,VEGFA,VEGFA,VEGFA,VEGFA	VEGFA
kgp17193783	6	43753895	VEGFA,VEGFA,VEGFA,VEGFA,VEGFA,VEGFA,VEGFA,VEGFA,VEGFA,VEGFA,VEGFA,VEGFA,VEGFA,VEGFA,VEGFA,VEGFA,VEGFA,VEGFA	VEGFA
kgp26137829	6	43753900	VEGFA,VEGFA,VEGFA,VEGFA,VEGFA,VEGFA,VEGFA,VEGFA,VEGFA,VEGFA,VEGFA,VEGFA,VEGFA,VEGFA,VEGFA,VEGFA,VEGFA,VEGFA	VEGFA
kgp20542724	8	6357191	MCPH1,ANGPT2,ANGPT2,ANGPT2	ANGPT2
kgp28827148	8	6357207	MCPH1,ANGPT2,ANGPT2,ANGPT2	ANGPT2
kgp7122077	8	6357235	MCPH1,ANGPT2,ANGPT2,ANGPT2	ANGPT2
kgp5904861	8	6357307	MCPH1,ANGPT2,ANGPT2,ANGPT2	ANGPT2
kgp20115965	8	6357515	MCPH1,ANGPT2,ANGPT2,ANGPT2	ANGPT2
kgp5584403	8	6357611	MCPH1,ANGPT2,ANGPT2,ANGPT2	ANGPT2
kgp7761388	8	6357639	MCPH1,ANGPT2,ANGPT2,ANGPT2	ANGPT2
kgp3763926	8	6357773	MCPH1,ANGPT2,ANGPT2,ANGPT2	ANGPT2
kgp1131766	8	6357986	MCPH1,ANGPT2,ANGPT2,ANGPT2	ANGPT2
kgp7878007	8	6357988	MCPH1,ANGPT2,ANGPT2,ANGPT2	ANGPT2
rs2442473	8	6358293	MCPH1,ANGPT2,ANGPT2,ANGPT2	ANGPT2
kgp28860011	8	6358452	MCPH1,ANGPT2,ANGPT2,ANGPT2	ANGPT2
kgp28843382	8	6358557	MCPH1,ANGPT2,ANGPT2,ANGPT2	ANGPT2
kgp28971724	8	6358656	MCPH1,ANGPT2,ANGPT2,ANGPT2	ANGPT2
kgp20278532	8	6358849	MCPH1,ANGPT2,ANGPT2,ANGPT2	ANGPT2
kgp20132429	8	6358986	MCPH1,ANGPT2,ANGPT2,ANGPT2	ANGPT2
kgp1184382	8	6359024	MCPH1,ANGPT2,ANGPT2,ANGPT2	ANGPT2
rs2167071	8	6359480	MCPH1,ANGPT2,ANGPT2,ANGPT2	ANGPT2
kgp10644659	8	6359559	MCPH1,ANGPT2,ANGPT2,ANGPT2	ANGPT2
kgp20211948	8	6359968	MCPH1,ANGPT2,ANGPT2,ANGPT2	ANGPT2
rs1053973	8	6360186	MCPH1,ANGPT2,ANGPT2,ANGPT2	ANGPT2
kgp7846762	8	6360289	MCPH1,ANGPT2,ANGPT2,ANGPT2	ANGPT2
kgp6648278	8	6360476	MCPH1,ANGPT2,ANGPT2,ANGPT2	ANGPT2
kgp28681763	8	6360542	MCPH1,ANGPT2,ANGPT2,ANGPT2	ANGPT2
kgp10729489	8	6361187	MCPH1,ANGPT2,ANGPT2,ANGPT2	ANGPT2
rs2979666	8	6361229	MCPH1,ANGPT2,ANGPT2,ANGPT2	ANGPT2
kgp10336435	8	6362375	MCPH1,ANGPT2,ANGPT2,ANGPT2	ANGPT2
kgp12337690	8	6363691	MCPH1,ANGPT2,ANGPT2,ANGPT2	ANGPT2
kgp7314193	8	6363918	MCPH1,ANGPT2,ANGPT2,ANGPT2	ANGPT2
kgp4171109	8	6364045	MCPH1,ANGPT2,ANGPT2,ANGPT2	ANGPT2
kgp20359637	8	6364100	MCPH1,ANGPT2,ANGPT2,ANGPT2	ANGPT2
kgp20449147	8	6364194	MCPH1,ANGPT2,ANGPT2,ANGPT2	ANGPT2
rs2515409	8	6364922	MCPH1,ANGPT2,ANGPT2,ANGPT2	ANGPT2
rs2515413	8	6365620	MCPH1,ANGPT2,ANGPT2,ANGPT2	ANGPT2
kgp7589269	8	6366001	MCPH1,ANGPT2,ANGPT2,ANGPT2	ANGPT2
rs2515416	8	6366338	MCPH1,ANGPT2,ANGPT2,ANGPT2	ANGPT2
kgp22822873	8	6366558	MCPH1,ANGPT2,ANGPT2,ANGPT2	ANGPT2
kgp20074989	8	6366759	MCPH1,ANGPT2,ANGPT2,ANGPT2	ANGPT2
kgp11441901	8	6366796	MCPH1,ANGPT2,ANGPT2,ANGPT2	ANGPT2
rs2442635	8	6367302	MCPH1,ANGPT2,ANGPT2,ANGPT2	ANGPT2
kgp5490644	8	6367380	MCPH1,ANGPT2,ANGPT2,ANGPT2	ANGPT2
kgp2518933	8	6367439	MCPH1,ANGPT2,ANGPT2,ANGPT2	ANGPT2
kgp28644285	8	6367503	MCPH1,ANGPT2,ANGPT2,ANGPT2	ANGPT2
kgp3511513	8	6367693	MCPH1,ANGPT2,ANGPT2,ANGPT2	ANGPT2
rs2515418	8	6368222	MCPH1,ANGPT2,ANGPT2,ANGPT2	ANGPT2
kgp10236515	8	6368314	MCPH1,ANGPT2,ANGPT2,ANGPT2	ANGPT2
rs2442632	8	6368412	MCPH1,ANGPT2,ANGPT2,ANGPT2	ANGPT2
rs2442631	8	6368776	MCPH1,ANGPT2,ANGPT2,ANGPT2	ANGPT2
kgp6375595	8	6369551	MCPH1,ANGPT2,ANGPT2,ANGPT2	ANGPT2
rs3780088	8	6369896	MCPH1,ANGPT2,ANGPT2,ANGPT2	ANGPT2
rs3020213	8	6369930	MCPH1,ANGPT2,ANGPT2,ANGPT2	ANGPT2
kgp20405690	8	6370043	MCPH1,ANGPT2,ANGPT2,ANGPT2	ANGPT2
kgp6026889	8	6370183	MCPH1,ANGPT2,ANGPT2,ANGPT2	ANGPT2
kgp20129759	8	6371182	MCPH1,ANGPT2,ANGPT2,ANGPT2	ANGPT2
kgp6759652	8	6371291	MCPH1,ANGPT2,ANGPT2,ANGPT2	ANGPT2
rs17063434	8	6371303	MCPH1,ANGPT2,ANGPT2,ANGPT2	ANGPT2
kgp8637171	8	6371448	MCPH1,ANGPT2,ANGPT2,ANGPT2	ANGPT2
rs1982386	8	6371476	MCPH1,ANGPT2,ANGPT2,ANGPT2	ANGPT2
kgp7883646	8	6371545	MCPH1,ANGPT2,ANGPT2,ANGPT2	ANGPT2
rs2916735	8	6372112	MCPH1,ANGPT2,ANGPT2,ANGPT2	ANGPT2
kgp11589350	8	6372172	MCPH1,ANGPT2,ANGPT2,ANGPT2	ANGPT2
kgp20468053	8	6372233	MCPH1,ANGPT2,ANGPT2,ANGPT2	ANGPT2
kgp28840485	8	6372298	MCPH1,ANGPT2,ANGPT2,ANGPT2	ANGPT2
kgp9054749	8	6372543	MCPH1,ANGPT2,ANGPT2,ANGPT2	ANGPT2
kgp6281573	8	6373499	MCPH1,ANGPT2,ANGPT2,ANGPT2	ANGPT2
rs4276711	8	6373705	MCPH1,ANGPT2,ANGPT2,ANGPT2	ANGPT2
rs2515429	8	6373996	MCPH1,ANGPT2,ANGPT2,ANGPT2	ANGPT2
kgp28645218	8	6374035	MCPH1,ANGPT2,ANGPT2,ANGPT2	ANGPT2
rs10102851	8	6374065	MCPH1,ANGPT2,ANGPT2,ANGPT2	ANGPT2
kgp1632148	8	6374353	MCPH1,ANGPT2,ANGPT2,ANGPT2	ANGPT2
kgp8682043	8	6374478	MCPH1,ANGPT2,ANGPT2,ANGPT2	ANGPT2
rs2515432	8	6374773	MCPH1,ANGPT2,ANGPT2,ANGPT2	ANGPT2
kgp1973685	8	6375044	MCPH1,ANGPT2,ANGPT2,ANGPT2	ANGPT2
kgp237604	8	6375289	MCPH1,ANGPT2,ANGPT2,ANGPT2	ANGPT2
kgp8145167	8	6375763	MCPH1,ANGPT2,ANGPT2,ANGPT2	ANGPT2
kgp9383325	8	6375877	MCPH1,ANGPT2,ANGPT2,ANGPT2	ANGPT2
kgp8140231	8	6375904	MCPH1,ANGPT2,ANGPT2,ANGPT2	ANGPT2
kgp20237428	8	6376224	MCPH1,ANGPT2,ANGPT2,ANGPT2	ANGPT2
kgp20364843	8	6376425	MCPH1,ANGPT2,ANGPT2,ANGPT2	ANGPT2
rs13281117	8	6376877	MCPH1,ANGPT2,ANGPT2,ANGPT2	ANGPT2
kgp1848015	8	6377330	MCPH1,ANGPT2,ANGPT2,ANGPT2	ANGPT2
rs1961222	8	6377433	MCPH1,ANGPT2,ANGPT2,ANGPT2	ANGPT2
kgp28911081	8	6377558	MCPH1,ANGPT2,ANGPT2,ANGPT2	ANGPT2
kgp20145997	8	6377929	MCPH1,ANGPT2,ANGPT2,ANGPT2	ANGPT2
kgp1817436	8	6378239	MCPH1,ANGPT2,ANGPT2,ANGPT2	ANGPT2
kgp6396650	8	6378691	MCPH1,ANGPT2,ANGPT2,ANGPT2	ANGPT2
rs3020221	8	6378763	MCPH1,ANGPT2,ANGPT2,ANGPT2	ANGPT2
kgp5955772	8	6378784	MCPH1,ANGPT2,ANGPT2,ANGPT2	ANGPT2
kgp28757618	8	6378794	MCPH1,ANGPT2,ANGPT2,ANGPT2	ANGPT2
kgp20613742	8	6378981	MCPH1,ANGPT2,ANGPT2,ANGPT2	ANGPT2
kgp28591125	8	6379111	MCPH1,ANGPT2,ANGPT2,ANGPT2	ANGPT2
kgp8283537	8	6382470	MCPH1,ANGPT2,ANGPT2,ANGPT2	ANGPT2
rs2515458	8	6382685	MCPH1,ANGPT2,ANGPT2,ANGPT2	ANGPT2
kgp1786018	8	6383421	MCPH1,ANGPT2,ANGPT2,ANGPT2	ANGPT2
kgp28751486	8	6383556	MCPH1,ANGPT2,ANGPT2,ANGPT2	ANGPT2
rs2515462	8	6383599	MCPH1,ANGPT2,ANGPT2,ANGPT2	ANGPT2
kgp20313221	8	6384344	MCPH1,ANGPT2,ANGPT2,ANGPT2	ANGPT2
kgp20502798	8	6385067	MCPH1,ANGPT2,ANGPT2,ANGPT2	ANGPT2
kgp20232580	8	6385150	MCPH1,ANGPT2,ANGPT2,ANGPT2	ANGPT2
kgp20335694	8	6385180	MCPH1,ANGPT2,ANGPT2,ANGPT2	ANGPT2
rs2515464	8	6385839	MCPH1,ANGPT2,ANGPT2,ANGPT2	ANGPT2
kgp10547763	8	6386110	MCPH1,ANGPT2,ANGPT2,ANGPT2	ANGPT2
rs6990020	8	6386204	MCPH1,ANGPT2,ANGPT2,ANGPT2	ANGPT2
rs3824310	8	6386250	MCPH1,ANGPT2,ANGPT2,ANGPT2	ANGPT2
rs2515466	8	6386286	MCPH1,ANGPT2,ANGPT2,ANGPT2	ANGPT2
kgp20073709	8	6386372	MCPH1,ANGPT2,ANGPT2,ANGPT2	ANGPT2
kgp6303808	8	6386441	MCPH1,ANGPT2,ANGPT2,ANGPT2	ANGPT2
kgp5605530	8	6386584	MCPH1,ANGPT2,ANGPT2,ANGPT2	ANGPT2
rs2442608	8	6386620	MCPH1,ANGPT2,ANGPT2,ANGPT2	ANGPT2
kgp1047531	8	6386743	MCPH1,ANGPT2,ANGPT2,ANGPT2	ANGPT2
rs1868553	8	6386824	MCPH1,ANGPT2,ANGPT2,ANGPT2	ANGPT2
kgp704286	8	6387308	MCPH1,ANGPT2,ANGPT2,ANGPT2	ANGPT2
rs734701	8	6388247	MCPH1,ANGPT2,ANGPT2,ANGPT2	ANGPT2
rs734704	8	6388306	MCPH1,ANGPT2,ANGPT2,ANGPT2	ANGPT2
rs2515477	8	6388640	MCPH1,ANGPT2,ANGPT2,ANGPT2	ANGPT2
kgp20447960	8	6388707	MCPH1,ANGPT2,ANGPT2,ANGPT2	ANGPT2
rs12674822	8	6389216	MCPH1,ANGPT2,ANGPT2,ANGPT2	ANGPT2
kgp1960956	8	6389439	MCPH1,ANGPT2,ANGPT2,ANGPT2	ANGPT2
kgp20075909	8	6389495	MCPH1,ANGPT2,ANGPT2,ANGPT2	ANGPT2
kgp3120947	8	6389828	MCPH1,ANGPT2,ANGPT2,ANGPT2	ANGPT2
rs2515481	8	6390027	MCPH1,ANGPT2,ANGPT2,ANGPT2	ANGPT2
kgp2169934	8	6390162	MCPH1,ANGPT2,ANGPT2,ANGPT2	ANGPT2
rs17077419	8	6390530	MCPH1,ANGPT2,ANGPT2,ANGPT2	ANGPT2
rs2442602	8	6390751	MCPH1,ANGPT2,ANGPT2,ANGPT2	ANGPT2
kgp10200486	8	6390827	MCPH1,ANGPT2,ANGPT2,ANGPT2	ANGPT2
kgp3130423	8	6390936	MCPH1,ANGPT2,ANGPT2,ANGPT2	ANGPT2
kgp9806328	8	6390975	MCPH1,ANGPT2,ANGPT2,ANGPT2	ANGPT2
kgp20518923	8	6391251	MCPH1,ANGPT2,ANGPT2,ANGPT2	ANGPT2
rs2959812	8	6391302	MCPH1,ANGPT2,ANGPT2,ANGPT2	ANGPT2
kgp5305701	8	6391659	MCPH1,ANGPT2,ANGPT2,ANGPT2	ANGPT2
kgp20475199	8	6392456	MCPH1,ANGPT2,ANGPT2,ANGPT2	ANGPT2
rs4841224	8	6392547	MCPH1,ANGPT2,ANGPT2,ANGPT2	ANGPT2
kgp20294289	8	6392651	MCPH1,ANGPT2,ANGPT2,ANGPT2	ANGPT2
rs2959809	8	6393780	MCPH1,ANGPT2,ANGPT2,ANGPT2	ANGPT2
kgp10372743	8	6393965	MCPH1,ANGPT2,ANGPT2,ANGPT2	ANGPT2
rs12550622	8	6394494	MCPH1,ANGPT2,ANGPT2,ANGPT2	ANGPT2
rs2442598	8	6394821	MCPH1,ANGPT2,ANGPT2,ANGPT2	ANGPT2
rs12541780	8	6394876	MCPH1,ANGPT2,ANGPT2,ANGPT2	ANGPT2
kgp1692239	8	6395024	MCPH1,ANGPT2,ANGPT2,ANGPT2	ANGPT2
kgp10290789	8	6395361	MCPH1,ANGPT2,ANGPT2,ANGPT2	ANGPT2
rs7014586	8	6395653	MCPH1,ANGPT2,ANGPT2,ANGPT2	ANGPT2
kgp1800099	8	6395819	MCPH1,ANGPT2,ANGPT2,ANGPT2	ANGPT2
rs11989215	8	6395909	MCPH1,ANGPT2,ANGPT2,ANGPT2	ANGPT2
kgp5470583	8	6396020	MCPH1,ANGPT2,ANGPT2,ANGPT2	ANGPT2
rs10092206	8	6396241	MCPH1,ANGPT2,ANGPT2,ANGPT2	ANGPT2
rs17623313	8	6396341	MCPH1,ANGPT2,ANGPT2,ANGPT2	ANGPT2
rs11775442	8	6396358	MCPH1,ANGPT2,ANGPT2,ANGPT2	ANGPT2
kgp2706843	8	6396603	MCPH1,ANGPT2,ANGPT2,ANGPT2	ANGPT2
rs2922876	8	6396696	MCPH1,ANGPT2,ANGPT2,ANGPT2	ANGPT2
rs13269021	8	6396763	MCPH1,ANGPT2,ANGPT2,ANGPT2	ANGPT2
rs1375668	8	6396870	MCPH1,ANGPT2,ANGPT2,ANGPT2	ANGPT2
kgp10819135	8	6396905	MCPH1,ANGPT2,ANGPT2,ANGPT2	ANGPT2
rs2897911	8	6396986	MCPH1,ANGPT2,ANGPT2,ANGPT2	ANGPT2
kgp872913	8	6397105	MCPH1,ANGPT2,ANGPT2,ANGPT2	ANGPT2
kgp20316638	8	6397583	MCPH1,ANGPT2,ANGPT2,ANGPT2	ANGPT2
kgp20563780	8	6397656	MCPH1,ANGPT2,ANGPT2,ANGPT2	ANGPT2
rs10099687	8	6397842	MCPH1,ANGPT2,ANGPT2,ANGPT2	ANGPT2
rs2922875	8	6397970	MCPH1,ANGPT2,ANGPT2,ANGPT2	ANGPT2
rs2922873	8	6398327	MCPH1,ANGPT2,ANGPT2,ANGPT2	ANGPT2
kgp11960257	8	6398597	MCPH1,ANGPT2,ANGPT2,ANGPT2	ANGPT2
rs13255574	8	6398677	MCPH1,ANGPT2,ANGPT2,ANGPT2	ANGPT2
kgp28896795	8	6398694	MCPH1,ANGPT2,ANGPT2,ANGPT2	ANGPT2
kgp2295265	8	6398749	MCPH1,ANGPT2,ANGPT2,ANGPT2	ANGPT2
kgp5498777	8	6398938	MCPH1,ANGPT2,ANGPT2,ANGPT2	ANGPT2
kgp20502921	8	6399181	MCPH1,ANGPT2,ANGPT2,ANGPT2	ANGPT2
kgp20236852	8	6399572	MCPH1,ANGPT2,ANGPT2,ANGPT2	ANGPT2
kgp9511058	8	6399600	MCPH1,ANGPT2,ANGPT2,ANGPT2	ANGPT2
kgp28706118	8	6399774	MCPH1,ANGPT2,ANGPT2,ANGPT2	ANGPT2
kgp5289267	8	6400005	MCPH1,ANGPT2,ANGPT2,ANGPT2	ANGPT2
kgp5334252	8	6400081	MCPH1,ANGPT2,ANGPT2,ANGPT2	ANGPT2
kgp1453469	8	6400448	MCPH1,ANGPT2,ANGPT2,ANGPT2	ANGPT2
rs9644414	8	6400800	MCPH1,ANGPT2,ANGPT2,ANGPT2	ANGPT2
kgp2895773	8	6401019	MCPH1,ANGPT2,ANGPT2,ANGPT2	ANGPT2
kgp11530019	8	6401553	MCPH1,ANGPT2,ANGPT2,ANGPT2	ANGPT2
kgp20570162	8	6401652	MCPH1,ANGPT2,ANGPT2,ANGPT2	ANGPT2
kgp1826494	8	6401899	MCPH1,ANGPT2,ANGPT2,ANGPT2	ANGPT2
rs4478599	8	6402366	MCPH1,ANGPT2,ANGPT2,ANGPT2	ANGPT2
rs13250248	8	6402367	MCPH1,ANGPT2,ANGPT2,ANGPT2	ANGPT2
kgp3928925	8	6402671	MCPH1,ANGPT2,ANGPT2,ANGPT2	ANGPT2
kgp89130	8	6402888	MCPH1,ANGPT2,ANGPT2,ANGPT2	ANGPT2
kgp5569959	8	6402931	MCPH1,ANGPT2,ANGPT2,ANGPT2	ANGPT2
rs2515488	8	6403006	MCPH1,ANGPT2,ANGPT2,ANGPT2	ANGPT2
kgp8707918	8	6403370	MCPH1,ANGPT2,ANGPT2,ANGPT2	ANGPT2
kgp6061323	8	6403605	MCPH1,ANGPT2,ANGPT2,ANGPT2	ANGPT2
kgp12037262	8	6404314	MCPH1,ANGPT2,ANGPT2,ANGPT2	ANGPT2
kgp20380138	8	6404330	MCPH1,ANGPT2,ANGPT2,ANGPT2	ANGPT2
kgp20206075	8	6404404	MCPH1,ANGPT2,ANGPT2,ANGPT2	ANGPT2
kgp28845320	8	6404534	MCPH1,ANGPT2,ANGPT2,ANGPT2	ANGPT2
rs17553089	8	6404947	MCPH1,ANGPT2,ANGPT2,ANGPT2	ANGPT2
rs2442592	8	6405608	MCPH1,ANGPT2,ANGPT2,ANGPT2	ANGPT2
kgp28819074	8	6406214	MCPH1,ANGPT2,ANGPT2,ANGPT2	ANGPT2
rs2515493	8	6406572	MCPH1,ANGPT2,ANGPT2,ANGPT2	ANGPT2
kgp20240548	8	6406894	MCPH1,ANGPT2,ANGPT2,ANGPT2	ANGPT2
kgp8953696	8	6408216	MCPH1,ANGPT2,ANGPT2,ANGPT2	ANGPT2
kgp1825342	8	6408682	MCPH1,ANGPT2,ANGPT2,ANGPT2	ANGPT2
kgp3459665	8	6409020	MCPH1,ANGPT2,ANGPT2,ANGPT2	ANGPT2
kgp9469281	8	6409312	MCPH1,ANGPT2,ANGPT2,ANGPT2	ANGPT2
kgp28922820	8	6409350	MCPH1,ANGPT2,ANGPT2,ANGPT2	ANGPT2
kgp28883520	8	6409917	MCPH1,ANGPT2,ANGPT2,ANGPT2	ANGPT2
kgp10313412	8	6410379	MCPH1,ANGPT2,ANGPT2,ANGPT2	ANGPT2
kgp3233390	8	6411094	MCPH1,ANGPT2,ANGPT2,ANGPT2	ANGPT2
kgp20553881	8	6411379	MCPH1,ANGPT2,ANGPT2,ANGPT2	ANGPT2
kgp3325954	8	6411499	MCPH1,ANGPT2,ANGPT2,ANGPT2	ANGPT2
kgp8064835	8	6411888	MCPH1,ANGPT2,ANGPT2,ANGPT2	ANGPT2
kgp20279761	8	6411988	MCPH1,ANGPT2,ANGPT2,ANGPT2	ANGPT2
kgp28616289	8	6412597	MCPH1,ANGPT2,ANGPT2,ANGPT2	ANGPT2
kgp11299050	8	6412625	MCPH1,ANGPT2,ANGPT2,ANGPT2	ANGPT2
kgp3921067	8	6412868	MCPH1,ANGPT2,ANGPT2,ANGPT2	ANGPT2
kgp20535677	8	6413471	MCPH1,ANGPT2,ANGPT2,ANGPT2	ANGPT2
kgp4961294	8	6413634	MCPH1,ANGPT2,ANGPT2,ANGPT2	ANGPT2
kgp20465351	8	6413815	MCPH1,ANGPT2,ANGPT2,ANGPT2	ANGPT2
rs12543837	8	6413948	MCPH1,ANGPT2,ANGPT2,ANGPT2	ANGPT2
kgp7182621	8	6413995	MCPH1,ANGPT2,ANGPT2,ANGPT2	ANGPT2
kgp10252549	8	6414044	MCPH1,ANGPT2,ANGPT2,ANGPT2	ANGPT2
rs2922894	8	6414091	MCPH1,ANGPT2,ANGPT2,ANGPT2	ANGPT2
kgp20284738	8	6414562	MCPH1,ANGPT2,ANGPT2,ANGPT2	ANGPT2
kgp20448783	8	6414589	MCPH1,ANGPT2,ANGPT2,ANGPT2	ANGPT2
kgp20623804	8	6414874	MCPH1,ANGPT2,ANGPT2,ANGPT2	ANGPT2
kgp20196014	8	6415056	MCPH1,ANGPT2,ANGPT2,ANGPT2	ANGPT2
kgp4516328	8	6415237	MCPH1,ANGPT2,ANGPT2,ANGPT2	ANGPT2
kgp11045990	8	6415793	MCPH1,ANGPT2,ANGPT2,ANGPT2	ANGPT2
rs2515505	8	6416847	MCPH1,ANGPT2,ANGPT2,ANGPT2	ANGPT2
kgp20055555	8	6417069	MCPH1,ANGPT2,ANGPT2,ANGPT2	ANGPT2
kgp3060337	8	6417505	MCPH1,ANGPT2,ANGPT2,ANGPT2	ANGPT2
rs12547077	8	6417834	MCPH1,ANGPT2,ANGPT2,ANGPT2	ANGPT2
rs921291	8	6417876	MCPH1,ANGPT2,ANGPT2,ANGPT2	ANGPT2
kgp20569526	8	6418247	MCPH1,ANGPT2,ANGPT2,ANGPT2	ANGPT2
kgp20388731	8	6418396	MCPH1,ANGPT2,ANGPT2,ANGPT2	ANGPT2
kgp20378183	8	6419258	MCPH1,ANGPT2,ANGPT2,ANGPT2	ANGPT2
kgp9637984	8	6419345	MCPH1,ANGPT2,ANGPT2,ANGPT2	ANGPT2
kgp20620754	8	6420360	MCPH1,ANGPT2,ANGPT2,ANGPT2	ANGPT2
kgp1860754	8	6420490	MCPH1,ANGPT2,ANGPT2,ANGPT2	ANGPT2
rs3739391	8	6420534	MCPH1,ANGPT2,ANGPT2,ANGPT2	ANGPT2
kgp20281985	8	6420570	MCPH1,ANGPT2,ANGPT2,ANGPT2	ANGPT2
rs3739392	8	6420574	MCPH1,ANGPT2,ANGPT2,ANGPT2	ANGPT2
kgp8230129	8	6420574	MCPH1,ANGPT2,ANGPT2,ANGPT2	ANGPT2
kgp28646717	8	6420660	MCPH1,ANGPT2,ANGPT2,ANGPT2	ANGPT2
kgp20611776	8	6420709	MCPH1,ANGPT2,ANGPT2,ANGPT2	ANGPT2
kgp28750075	8	108262102	ANGPT1,ANGPT1	ANGPT1
kgp20506745	8	108262262	ANGPT1,ANGPT1	ANGPT1
kgp20311950	8	108262374	ANGPT1,ANGPT1	ANGPT1
kgp5452356	8	108262382	ANGPT1,ANGPT1	ANGPT1
kgp20234497	8	108262484	ANGPT1,ANGPT1	ANGPT1
kgp20382273	8	108262508	ANGPT1,ANGPT1	ANGPT1
kgp58888	8	108262669	ANGPT1,ANGPT1	ANGPT1
kgp20516617	8	108262861	ANGPT1,ANGPT1	ANGPT1
kgp20323909	8	108263623	ANGPT1,ANGPT1	ANGPT1
kgp20613623	8	108263638	ANGPT1,ANGPT1	ANGPT1
kgp6775910	8	108263871	ANGPT1,ANGPT1	ANGPT1
kgp20622191	8	108264273	ANGPT1,ANGPT1	ANGPT1
kgp4799066	8	108265283	ANGPT1,ANGPT1	ANGPT1
kgp20447044	8	108265353	ANGPT1,ANGPT1	ANGPT1
kgp28655048	8	108265492	ANGPT1,ANGPT1	ANGPT1
kgp9059914	8	108266007	ANGPT1,ANGPT1	ANGPT1
kgp28857838	8	108266789	ANGPT1,ANGPT1	ANGPT1
rs10100390	8	108266983	ANGPT1,ANGPT1	ANGPT1
kgp20084425	8	108267368	ANGPT1,ANGPT1	ANGPT1
kgp28763341	8	108267741	ANGPT1,ANGPT1	ANGPT1
kgp8786917	8	108267915	ANGPT1,ANGPT1	ANGPT1
kgp9413832	8	108269027	ANGPT1,ANGPT1	ANGPT1
kgp11625996	8	108269427	ANGPT1,ANGPT1	ANGPT1
rs2507802	8	108270037	ANGPT1,ANGPT1	ANGPT1
kgp3701034	8	108270719	ANGPT1,ANGPT1	ANGPT1
kgp6878346	8	108271176	ANGPT1,ANGPT1	ANGPT1
kgp20126699	8	108271655	ANGPT1,ANGPT1	ANGPT1
kgp3971191	8	108271908	ANGPT1,ANGPT1	ANGPT1
kgp6472688	8	108272706	ANGPT1,ANGPT1	ANGPT1
rs7007769	8	108272861	ANGPT1,ANGPT1	ANGPT1
kgp4777619	8	108272998	ANGPT1,ANGPT1	ANGPT1
rs2514878	8	108273016	ANGPT1,ANGPT1	ANGPT1
kgp5199370	8	108275009	ANGPT1,ANGPT1	ANGPT1
kgp12088283	8	108275857	ANGPT1,ANGPT1	ANGPT1
kgp20482109	8	108277777	ANGPT1,ANGPT1	ANGPT1
kgp364928	8	108278139	ANGPT1,ANGPT1	ANGPT1
rs10505100	8	108278616	ANGPT1,ANGPT1	ANGPT1
kgp11035053	8	108279046	ANGPT1,ANGPT1	ANGPT1
kgp2838900	8	108279048	ANGPT1,ANGPT1	ANGPT1
rs11777978	8	108279912	ANGPT1,ANGPT1	ANGPT1
kgp9889662	8	108280039	ANGPT1,ANGPT1	ANGPT1
kgp9238024	8	108280438	ANGPT1,ANGPT1	ANGPT1
kgp1590452	8	108280746	ANGPT1,ANGPT1	ANGPT1
kgp12285070	8	108283323	ANGPT1,ANGPT1	ANGPT1
rs10505101	8	108283945	ANGPT1,ANGPT1	ANGPT1
kgp4175925	8	108284126	ANGPT1,ANGPT1	ANGPT1
kgp3192525	8	108284910	ANGPT1,ANGPT1	ANGPT1
kgp10703397	8	108285002	ANGPT1,ANGPT1	ANGPT1
kgp20411685	8	108286264	ANGPT1,ANGPT1	ANGPT1
kgp6710851	8	108287280	ANGPT1,ANGPT1	ANGPT1
rs9297393	8	108287577	ANGPT1,ANGPT1	ANGPT1
rs10090742	8	108287597	ANGPT1,ANGPT1	ANGPT1
rs7009229	8	108287752	ANGPT1,ANGPT1	ANGPT1
kgp2069098	8	108288085	ANGPT1,ANGPT1	ANGPT1
kgp5936631	8	108289698	ANGPT1,ANGPT1	ANGPT1
kgp3480561	8	108290430	ANGPT1,ANGPT1	ANGPT1
kgp3407513	8	108290759	ANGPT1,ANGPT1	ANGPT1
kgp5781594	8	108290925	ANGPT1,ANGPT1	ANGPT1
kgp11457161	8	108291877	ANGPT1,ANGPT1	ANGPT1
kgp20599085	8	108292007	ANGPT1,ANGPT1	ANGPT1
rs13257393	8	108292664	ANGPT1,ANGPT1	ANGPT1
kgp20190523	8	108292683	ANGPT1,ANGPT1	ANGPT1
kgp2886417	8	108293424	ANGPT1,ANGPT1	ANGPT1
kgp3598855	8	108293443	ANGPT1,ANGPT1	ANGPT1
kgp1141697	8	108293655	ANGPT1,ANGPT1	ANGPT1
rs7846052	8	108294209	ANGPT1,ANGPT1	ANGPT1
kgp2179539	8	108294335	ANGPT1,ANGPT1	ANGPT1
kgp4749291	8	108294685	ANGPT1,ANGPT1	ANGPT1
kgp28649621	8	108295478	ANGPT1,ANGPT1	ANGPT1
kgp3318017	8	108295828	ANGPT1,ANGPT1	ANGPT1
kgp20450395	8	108297122	ANGPT1,ANGPT1	ANGPT1
kgp20384693	8	108298191	ANGPT1,ANGPT1	ANGPT1
kgp20522546	8	108298657	ANGPT1,ANGPT1	ANGPT1
kgp28902755	8	108299330	ANGPT1,ANGPT1	ANGPT1
rs4595097	8	108299501	ANGPT1,ANGPT1	ANGPT1
kgp2943658	8	108300749	ANGPT1,ANGPT1	ANGPT1
kgp20245733	8	108301763	ANGPT1,ANGPT1	ANGPT1
rs4324901	8	108301798	ANGPT1,ANGPT1	ANGPT1
kgp20314879	8	108304715	ANGPT1,ANGPT1	ANGPT1
kgp8329081	8	108306155	ANGPT1,ANGPT1	ANGPT1
rs10110459	8	108306367	ANGPT1,ANGPT1	ANGPT1
rs6982586	8	108307058	ANGPT1,ANGPT1	ANGPT1
rs10505105	8	108307337	ANGPT1,ANGPT1	ANGPT1
kgp28809287	8	108307648	ANGPT1,ANGPT1	ANGPT1
kgp20203752	8	108308673	ANGPT1,ANGPT1	ANGPT1
kgp778862	8	108309010	ANGPT1,ANGPT1	ANGPT1
kgp8241931	8	108309239	ANGPT1,ANGPT1	ANGPT1
rs10107638	8	108309253	ANGPT1,ANGPT1	ANGPT1
kgp1206021	8	108309456	ANGPT1,ANGPT1	ANGPT1
kgp28625964	8	108309475	ANGPT1,ANGPT1	ANGPT1
kgp20537084	8	108310893	ANGPT1,ANGPT1	ANGPT1
kgp2633759	8	108314350	ANGPT1,ANGPT1	ANGPT1
kgp2974594	8	108314675	ANGPT1,ANGPT1	ANGPT1
rs4133395	8	108314971	ANGPT1,ANGPT1	ANGPT1
rs4472483	8	108315277	ANGPT1,ANGPT1	ANGPT1
kgp2855260	8	108315462	ANGPT1,ANGPT1	ANGPT1
kgp20320751	8	108315615	ANGPT1,ANGPT1	ANGPT1
kgp6156302	8	108317019	ANGPT1,ANGPT1	ANGPT1
kgp9671736	8	108317615	ANGPT1,ANGPT1	ANGPT1
kgp6134638	8	108318092	ANGPT1,ANGPT1	ANGPT1
kgp11893136	8	108318572	ANGPT1,ANGPT1	ANGPT1
kgp20417349	8	108319792	ANGPT1,ANGPT1	ANGPT1
kgp784200	8	108319808	ANGPT1,ANGPT1	ANGPT1
kgp10320586	8	108320079	ANGPT1,ANGPT1	ANGPT1
kgp3535255	8	108320265	ANGPT1,ANGPT1	ANGPT1
kgp2753884	8	108321048	ANGPT1,ANGPT1	ANGPT1
kgp12095850	8	108321472	ANGPT1,ANGPT1	ANGPT1
kgp6794599	8	108323713	ANGPT1,ANGPT1	ANGPT1
kgp7237939	8	108324756	ANGPT1,ANGPT1	ANGPT1
kgp28932484	8	108325093	ANGPT1,ANGPT1	ANGPT1
rs4626569	8	108326351	ANGPT1,ANGPT1	ANGPT1
kgp28648746	8	108326542	ANGPT1,ANGPT1	ANGPT1
rs17361877	8	108327040	ANGPT1,ANGPT1	ANGPT1
rs16876018	8	108327348	ANGPT1,ANGPT1	ANGPT1
kgp1514685	8	108328377	ANGPT1,ANGPT1	ANGPT1
kgp20149923	8	108329245	ANGPT1,ANGPT1	ANGPT1
kgp3684739	8	108329350	ANGPT1,ANGPT1	ANGPT1
rs4397378	8	108329796	ANGPT1,ANGPT1	ANGPT1
kgp4861250	8	108331819	ANGPT1,ANGPT1	ANGPT1
rs4341142	8	108332485	ANGPT1,ANGPT1	ANGPT1
kgp10110512	8	108332617	ANGPT1,ANGPT1	ANGPT1
kgp20144975	8	108333061	ANGPT1,ANGPT1	ANGPT1
kgp5704957	8	108334162	ANGPT1,ANGPT1	ANGPT1
rs11781223	8	108334662	ANGPT1,ANGPT1	ANGPT1
kgp20058976	8	108334924	ANGPT1,ANGPT1	ANGPT1
kgp20285858	8	108335565	ANGPT1,ANGPT1	ANGPT1
kgp20597433	8	108336889	ANGPT1,ANGPT1	ANGPT1
kgp4775628	8	108338177	ANGPT1,ANGPT1	ANGPT1
kgp28739958	8	108338584	ANGPT1,ANGPT1	ANGPT1
kgp5699877	8	108339700	ANGPT1,ANGPT1	ANGPT1
kgp9951194	8	108340883	ANGPT1,ANGPT1	ANGPT1
rs10955450	8	108341751	ANGPT1,ANGPT1	ANGPT1
kgp2419157	8	108342237	ANGPT1,ANGPT1	ANGPT1
rs4262299	8	108342263	ANGPT1,ANGPT1	ANGPT1
kgp265668	8	108342490	ANGPT1,ANGPT1	ANGPT1
kgp20083092	8	108344201	ANGPT1,ANGPT1	ANGPT1
kgp20214482	8	108344325	ANGPT1,ANGPT1	ANGPT1
rs2514888	8	108347114	ANGPT1,ANGPT1	ANGPT1
kgp11454314	8	108347806	ANGPT1,ANGPT1	ANGPT1
kgp218685	8	108347956	ANGPT1,ANGPT1	ANGPT1
kgp20113587	8	108348550	ANGPT1,ANGPT1	ANGPT1
kgp22791511	8	108349061	ANGPT1,ANGPT1	ANGPT1
kgp5150806	8	108349425	ANGPT1,ANGPT1	ANGPT1
kgp3583618	8	108349961	ANGPT1,ANGPT1	ANGPT1
kgp20069954	8	108350920	ANGPT1,ANGPT1	ANGPT1
rs1902323	8	108354035	ANGPT1,ANGPT1	ANGPT1
kgp11039576	8	108354079	ANGPT1,ANGPT1	ANGPT1
kgp8045162	8	108355211	ANGPT1,ANGPT1	ANGPT1
kgp11245951	8	108355296	ANGPT1,ANGPT1	ANGPT1
kgp1315735	8	108355461	ANGPT1,ANGPT1	ANGPT1
kgp8367887	8	108356723	ANGPT1,ANGPT1	ANGPT1
kgp8506572	8	108357096	ANGPT1,ANGPT1	ANGPT1
rs2043339	8	108358009	ANGPT1,ANGPT1	ANGPT1
kgp12506956	8	108358774	ANGPT1,ANGPT1	ANGPT1
rs10156238	8	108359453	ANGPT1,ANGPT1	ANGPT1
rs1433178	8	108360046	ANGPT1,ANGPT1	ANGPT1
kgp20429555	8	108360291	ANGPT1,ANGPT1	ANGPT1
kgp10577570	8	108360529	ANGPT1,ANGPT1	ANGPT1
kgp20179864	8	108361136	ANGPT1,ANGPT1	ANGPT1
kgp5398488	8	108361792	ANGPT1,ANGPT1	ANGPT1
kgp28844426	8	108362834	ANGPT1,ANGPT1	ANGPT1
rs16876090	8	108363596	ANGPT1,ANGPT1	ANGPT1
kgp1215236	8	108364749	ANGPT1,ANGPT1	ANGPT1
kgp11416184	8	108365345	ANGPT1,ANGPT1	ANGPT1
rs1283651	8	108366032	ANGPT1,ANGPT1	ANGPT1
rs1433195	8	108366127	ANGPT1,ANGPT1	ANGPT1
kgp887746	8	108367044	ANGPT1,ANGPT1	ANGPT1
kgp5674204	8	108367678	ANGPT1,ANGPT1	ANGPT1
kgp3717534	8	108368856	ANGPT1,ANGPT1	ANGPT1
kgp5539069	8	108369037	ANGPT1,ANGPT1	ANGPT1
kgp9232548	8	108369127	ANGPT1,ANGPT1	ANGPT1
kgp28840233	8	108369797	ANGPT1,ANGPT1	ANGPT1
rs2445353	8	108369839	ANGPT1,ANGPT1	ANGPT1
kgp28663753	8	108369948	ANGPT1,ANGPT1	ANGPT1
kgp772162	8	108370415	ANGPT1,ANGPT1	ANGPT1
kgp28846990	8	108371936	ANGPT1,ANGPT1	ANGPT1
rs2436556	8	108372446	ANGPT1,ANGPT1	ANGPT1
kgp6214663	8	108373109	ANGPT1,ANGPT1	ANGPT1
kgp20611525	8	108373256	ANGPT1,ANGPT1	ANGPT1
kgp28713469	8	108376974	ANGPT1,ANGPT1	ANGPT1
kgp11020291	8	108377093	ANGPT1,ANGPT1	ANGPT1
kgp8405710	8	108377199	ANGPT1,ANGPT1	ANGPT1
rs1283658	8	108377347	ANGPT1,ANGPT1	ANGPT1
rs2163870	8	108377901	ANGPT1,ANGPT1	ANGPT1
kgp22811159	8	108378085	ANGPT1,ANGPT1	ANGPT1
rs1672149	8	108378311	ANGPT1,ANGPT1	ANGPT1
rs1293194	8	108378411	ANGPT1,ANGPT1	ANGPT1
rs2514857	8	108378623	ANGPT1,ANGPT1	ANGPT1
kgp10283221	8	108378833	ANGPT1,ANGPT1	ANGPT1
rs1654701	8	108378945	ANGPT1,ANGPT1	ANGPT1
kgp20390425	8	108379235	ANGPT1,ANGPT1	ANGPT1
kgp4236284	8	108379311	ANGPT1,ANGPT1	ANGPT1
rs2445365	8	108383325	ANGPT1,ANGPT1	ANGPT1
kgp20069045	8	108383636	ANGPT1,ANGPT1	ANGPT1
rs1672195	8	108383641	ANGPT1,ANGPT1	ANGPT1
kgp6607890	8	108384414	ANGPT1,ANGPT1	ANGPT1
kgp4194413	8	108384635	ANGPT1,ANGPT1	ANGPT1
rs1654712	8	108385748	ANGPT1,ANGPT1	ANGPT1
kgp2301625	8	108385864	ANGPT1,ANGPT1	ANGPT1
kgp8243223	8	108386173	ANGPT1,ANGPT1	ANGPT1
rs1347183	8	108386442	ANGPT1,ANGPT1	ANGPT1
kgp28689108	8	108387479	ANGPT1,ANGPT1	ANGPT1
rs1672184	8	108387747	ANGPT1,ANGPT1	ANGPT1
kgp5240140	8	108388126	ANGPT1,ANGPT1	ANGPT1
kgp4577722	8	108388485	ANGPT1,ANGPT1	ANGPT1
rs2436557	8	108389120	ANGPT1,ANGPT1	ANGPT1
rs2514861	8	108389150	ANGPT1,ANGPT1	ANGPT1
rs2514862	8	108389187	ANGPT1,ANGPT1	ANGPT1
kgp8132474	8	108391517	ANGPT1,ANGPT1	ANGPT1
kgp10530507	8	108392597	ANGPT1,ANGPT1	ANGPT1
rs1433176	8	108392928	ANGPT1,ANGPT1	ANGPT1
kgp10292	8	108393050	ANGPT1,ANGPT1	ANGPT1
kgp20072138	8	108393332	ANGPT1,ANGPT1	ANGPT1
rs2436559	8	108393683	ANGPT1,ANGPT1	ANGPT1
rs2514864	8	108393800	ANGPT1,ANGPT1	ANGPT1
kgp8862193	8	108393977	ANGPT1,ANGPT1	ANGPT1
kgp28722887	8	108394820	ANGPT1,ANGPT1	ANGPT1
rs16876199	8	108395025	ANGPT1,ANGPT1	ANGPT1
kgp2630832	8	108395695	ANGPT1,ANGPT1	ANGPT1
kgp9338469	8	108396035	ANGPT1,ANGPT1	ANGPT1
rs2916083	8	108398406	ANGPT1,ANGPT1	ANGPT1
kgp2548591	8	108400242	ANGPT1,ANGPT1	ANGPT1
kgp3723605	8	108400681	ANGPT1,ANGPT1	ANGPT1
rs1283706	8	108400823	ANGPT1,ANGPT1	ANGPT1
kgp10344051	8	108401511	ANGPT1,ANGPT1	ANGPT1
rs16876215	8	108401601	ANGPT1,ANGPT1	ANGPT1
rs1283703	8	108403482	ANGPT1,ANGPT1	ANGPT1
kgp28716744	8	108405373	ANGPT1,ANGPT1	ANGPT1
kgp6885705	8	108405616	ANGPT1,ANGPT1	ANGPT1
kgp20386054	8	108406111	ANGPT1,ANGPT1	ANGPT1
kgp20054385	8	108407076	ANGPT1,ANGPT1	ANGPT1
rs10955455	8	108407313	ANGPT1,ANGPT1	ANGPT1
rs4268102	8	108408409	ANGPT1,ANGPT1	ANGPT1
rs11785702	8	108409423	ANGPT1,ANGPT1	ANGPT1
kgp4811960	8	108409751	ANGPT1,ANGPT1	ANGPT1
rs1283663	8	108409931	ANGPT1,ANGPT1	ANGPT1
kgp12014874	8	108411036	ANGPT1,ANGPT1	ANGPT1
kgp2076282	8	108411542	ANGPT1,ANGPT1	ANGPT1
kgp5261974	8	108412243	ANGPT1,ANGPT1	ANGPT1
kgp2158865	8	108412542	ANGPT1,ANGPT1	ANGPT1
kgp1404037	8	108412793	ANGPT1,ANGPT1	ANGPT1
kgp7700047	8	108413199	ANGPT1,ANGPT1	ANGPT1
kgp8488107	8	108413337	ANGPT1,ANGPT1	ANGPT1
kgp20168442	8	108414096	ANGPT1,ANGPT1	ANGPT1
kgp20258617	8	108414255	ANGPT1,ANGPT1	ANGPT1
kgp5480713	8	108414267	ANGPT1,ANGPT1	ANGPT1
kgp12103779	8	108414308	ANGPT1,ANGPT1	ANGPT1
kgp3123619	8	108415339	ANGPT1,ANGPT1	ANGPT1
kgp110099	8	108416308	ANGPT1,ANGPT1	ANGPT1
rs1283687	8	108416439	ANGPT1,ANGPT1	ANGPT1
kgp6721377	8	108418905	ANGPT1,ANGPT1	ANGPT1
kgp413892	8	108419508	ANGPT1,ANGPT1	ANGPT1
kgp8821598	8	108419903	ANGPT1,ANGPT1	ANGPT1
rs16876241	8	108420688	ANGPT1,ANGPT1	ANGPT1
kgp22819632	8	108420751	ANGPT1,ANGPT1	ANGPT1
kgp20091145	8	108420852	ANGPT1,ANGPT1	ANGPT1
kgp7710359	8	108421335	ANGPT1,ANGPT1	ANGPT1
kgp3436957	8	108421574	ANGPT1,ANGPT1	ANGPT1
rs892248	8	108422946	ANGPT1,ANGPT1	ANGPT1
kgp345638	8	108423399	ANGPT1,ANGPT1	ANGPT1
rs10110293	8	108424187	ANGPT1,ANGPT1	ANGPT1
rs1654751	8	108424451	ANGPT1,ANGPT1	ANGPT1
kgp20436899	8	108425601	ANGPT1,ANGPT1	ANGPT1
kgp9742050	8	108426583	ANGPT1,ANGPT1	ANGPT1
kgp5802823	8	108427335	ANGPT1,ANGPT1	ANGPT1
rs1283679	8	108427493	ANGPT1,ANGPT1	ANGPT1
rs1283678	8	108427960	ANGPT1,ANGPT1	ANGPT1
kgp5344950	8	108428790	ANGPT1,ANGPT1	ANGPT1
kgp3906114	8	108429605	ANGPT1,ANGPT1	ANGPT1
kgp28677881	8	108430038	ANGPT1,ANGPT1	ANGPT1
rs1283673	8	108431161	ANGPT1,ANGPT1	ANGPT1
kgp5469299	8	108431848	ANGPT1,ANGPT1	ANGPT1
kgp7912297	8	108432379	ANGPT1,ANGPT1	ANGPT1
kgp28799308	8	108432659	ANGPT1,ANGPT1	ANGPT1
kgp20217572	8	108433973	ANGPT1,ANGPT1	ANGPT1
kgp10349998	8	108434558	ANGPT1,ANGPT1	ANGPT1
rs1283670	8	108434677	ANGPT1,ANGPT1	ANGPT1
rs1283701	8	108437679	ANGPT1,ANGPT1	ANGPT1
kgp5077953	8	108438485	ANGPT1,ANGPT1	ANGPT1
rs1283699	8	108438906	ANGPT1,ANGPT1	ANGPT1
kgp11182835	8	108439029	ANGPT1,ANGPT1	ANGPT1
rs13263947	8	108439362	ANGPT1,ANGPT1	ANGPT1
kgp4594287	8	108439699	ANGPT1,ANGPT1	ANGPT1
rs1004460	8	108439898	ANGPT1,ANGPT1	ANGPT1
kgp28866517	8	108439963	ANGPT1,ANGPT1	ANGPT1
rs1004459	8	108440057	ANGPT1,ANGPT1	ANGPT1
rs13439018	8	108440510	ANGPT1,ANGPT1	ANGPT1
kgp3254879	8	108441515	ANGPT1,ANGPT1	ANGPT1
kgp5853097	8	108441572	ANGPT1,ANGPT1	ANGPT1
rs10086336	8	108441642	ANGPT1,ANGPT1	ANGPT1
kgp20568529	8	108441699	ANGPT1,ANGPT1	ANGPT1
kgp8684746	8	108443056	ANGPT1,ANGPT1	ANGPT1
rs1283682	8	108445220	ANGPT1,ANGPT1	ANGPT1
kgp10856757	8	108445388	ANGPT1,ANGPT1	ANGPT1
kgp20555959	8	108445569	ANGPT1,ANGPT1	ANGPT1
kgp20180328	8	108445741	ANGPT1,ANGPT1	ANGPT1
rs11786476	8	108445788	ANGPT1,ANGPT1	ANGPT1
rs1283681	8	108445984	ANGPT1,ANGPT1	ANGPT1
kgp1372872	8	108446203	ANGPT1,ANGPT1	ANGPT1
kgp8376888	8	108446230	ANGPT1,ANGPT1	ANGPT1
rs13280030	8	108446403	ANGPT1,ANGPT1	ANGPT1
kgp20374718	8	108446696	ANGPT1,ANGPT1	ANGPT1
kgp11381018	8	108446855	ANGPT1,ANGPT1	ANGPT1
kgp22763726	8	108447358	ANGPT1,ANGPT1	ANGPT1
rs13255500	8	108447543	ANGPT1,ANGPT1	ANGPT1
rs1433185	8	108447635	ANGPT1,ANGPT1	ANGPT1
kgp3384662	8	108447975	ANGPT1,ANGPT1	ANGPT1
kgp5044627	8	108448123	ANGPT1,ANGPT1	ANGPT1
kgp20227752	8	108448535	ANGPT1,ANGPT1	ANGPT1
kgp2229553	8	108448613	ANGPT1,ANGPT1	ANGPT1
kgp20254736	8	108449725	ANGPT1,ANGPT1	ANGPT1
kgp20198378	8	108449942	ANGPT1,ANGPT1	ANGPT1
kgp5669159	8	108450313	ANGPT1,ANGPT1	ANGPT1
kgp28569505	8	108451548	ANGPT1,ANGPT1	ANGPT1
kgp2751305	8	108451688	ANGPT1,ANGPT1	ANGPT1
kgp11541719	8	108451958	ANGPT1,ANGPT1	ANGPT1
rs1433184	8	108452794	ANGPT1,ANGPT1	ANGPT1
kgp2029831	8	108453713	ANGPT1,ANGPT1	ANGPT1
kgp20572318	8	108454414	ANGPT1,ANGPT1	ANGPT1
rs13273578	8	108454681	ANGPT1,ANGPT1	ANGPT1
kgp2105130	8	108454974	ANGPT1,ANGPT1	ANGPT1
kgp28680433	8	108455759	ANGPT1,ANGPT1	ANGPT1
kgp10491832	8	108456167	ANGPT1,ANGPT1	ANGPT1
rs3847160	8	108456531	ANGPT1,ANGPT1	ANGPT1
rs4114169	8	108456805	ANGPT1,ANGPT1	ANGPT1
kgp12233205	8	108457299	ANGPT1,ANGPT1	ANGPT1
rs1654680	8	108457353	ANGPT1,ANGPT1	ANGPT1
kgp28704483	8	108457419	ANGPT1,ANGPT1	ANGPT1
kgp28582634	8	108457735	ANGPT1,ANGPT1	ANGPT1
rs10098499	8	108458582	ANGPT1,ANGPT1	ANGPT1
kgp20222783	8	108459069	ANGPT1,ANGPT1	ANGPT1
kgp4592149	8	108459130	ANGPT1,ANGPT1	ANGPT1
rs10102601	8	108459674	ANGPT1,ANGPT1	ANGPT1
rs1283722	8	108460133	ANGPT1,ANGPT1	ANGPT1
kgp787370	8	108461005	ANGPT1,ANGPT1	ANGPT1
rs1836031	8	108461525	ANGPT1,ANGPT1	ANGPT1
rs1433165	8	108461828	ANGPT1,ANGPT1	ANGPT1
kgp20325650	8	108462412	ANGPT1,ANGPT1	ANGPT1
rs1433166	8	108462641	ANGPT1,ANGPT1	ANGPT1
rs13274462	8	108463603	ANGPT1,ANGPT1	ANGPT1
rs11991529	8	108463840	ANGPT1,ANGPT1	ANGPT1
kgp12155373	8	108464915	ANGPT1,ANGPT1	ANGPT1
kgp11525329	8	108465361	ANGPT1,ANGPT1	ANGPT1
kgp3605594	8	108466254	ANGPT1,ANGPT1	ANGPT1
rs1283713	8	108466317	ANGPT1,ANGPT1	ANGPT1
kgp12324717	8	108467689	ANGPT1,ANGPT1	ANGPT1
kgp767089	8	108468796	ANGPT1,ANGPT1	ANGPT1
kgp20276426	8	108470386	ANGPT1,ANGPT1	ANGPT1
kgp1191641	8	108471897	ANGPT1,ANGPT1	ANGPT1
kgp20321576	8	108472037	ANGPT1,ANGPT1	ANGPT1
rs16876325	8	108472213	ANGPT1,ANGPT1	ANGPT1
rs1283720	8	108472328	ANGPT1,ANGPT1	ANGPT1
kgp12231477	8	108472489	ANGPT1,ANGPT1	ANGPT1
kgp1946638	8	108473073	ANGPT1,ANGPT1	ANGPT1
kgp2915151	8	108475856	ANGPT1,ANGPT1	ANGPT1
kgp7659629	8	108476231	ANGPT1,ANGPT1	ANGPT1
kgp6942743	8	108476236	ANGPT1,ANGPT1	ANGPT1
rs1433168	8	108476951	ANGPT1,ANGPT1	ANGPT1
kgp862466	8	108477351	ANGPT1,ANGPT1	ANGPT1
kgp1236859	8	108478183	ANGPT1,ANGPT1	ANGPT1
kgp6175616	8	108479328	ANGPT1,ANGPT1	ANGPT1
kgp28829686	8	108480062	ANGPT1,ANGPT1	ANGPT1
kgp28908091	8	108480065	ANGPT1,ANGPT1	ANGPT1
kgp20515101	8	108481017	ANGPT1,ANGPT1	ANGPT1
kgp6183306	8	108481964	ANGPT1,ANGPT1	ANGPT1
kgp5433797	8	108482205	ANGPT1,ANGPT1	ANGPT1
kgp2028099	8	108482717	ANGPT1,ANGPT1	ANGPT1
rs1433169	8	108484298	ANGPT1,ANGPT1	ANGPT1
kgp20174084	8	108484686	ANGPT1,ANGPT1	ANGPT1
rs2195989	8	108485912	ANGPT1,ANGPT1	ANGPT1
rs951759	8	108489996	ANGPT1,ANGPT1	ANGPT1
kgp8118141	8	108490096	ANGPT1,ANGPT1	ANGPT1
rs1157411	8	108490998	ANGPT1,ANGPT1	ANGPT1
kgp6168766	8	108491344	ANGPT1,ANGPT1	ANGPT1
kgp5813659	8	108494567	ANGPT1,ANGPT1	ANGPT1
kgp8298054	8	108494771	ANGPT1,ANGPT1	ANGPT1
rs10505108	8	108495057	ANGPT1,ANGPT1	ANGPT1
kgp22731872	8	108496499	ANGPT1,ANGPT1	ANGPT1
kgp7005460	8	108497859	ANGPT1,ANGPT1	ANGPT1
kgp5691898	8	108498589	ANGPT1,ANGPT1	ANGPT1
kgp2400877	8	108498850	ANGPT1,ANGPT1	ANGPT1
kgp6756647	8	108499602	ANGPT1,ANGPT1	ANGPT1
rs13257142	8	108499883	ANGPT1,ANGPT1	ANGPT1
kgp20265041	8	108500061	ANGPT1,ANGPT1	ANGPT1
kgp2930872	8	108500485	ANGPT1,ANGPT1	ANGPT1
kgp7640452	8	108500501	ANGPT1,ANGPT1	ANGPT1
kgp12000813	8	108500879	ANGPT1,ANGPT1	ANGPT1
kgp2315844	8	108501540	ANGPT1,ANGPT1	ANGPT1
kgp440445	8	108501743	ANGPT1,ANGPT1	ANGPT1
rs6469116	8	108502688	ANGPT1,ANGPT1	ANGPT1
rs13272688	8	108503702	ANGPT1,ANGPT1	ANGPT1
kgp9977988	8	108504565	ANGPT1,ANGPT1	ANGPT1
kgp11707347	8	108504980	ANGPT1,ANGPT1	ANGPT1
kgp8435403	8	108505085	ANGPT1,ANGPT1	ANGPT1
kgp20564262	8	108505424	ANGPT1,ANGPT1	ANGPT1
P1_M_061510_8_484_M	8	108506363	ANGPT1,ANGPT1	ANGPT1
kgp20590856	8	108509446	ANGPT1,ANGPT1	ANGPT1
kgp2224399	8	108509559	ANGPT1,ANGPT1	ANGPT1
kgp18592914	9	27109164	TEK	TEK
kgp27389149	9	27109449	TEK	TEK
kgp22758803	9	27109973	TEK	TEK
kgp10501736	9	27110382	TEK	TEK
kgp6296850	9	27110480	TEK	TEK
kgp12248271	9	27110507	TEK	TEK
kgp5704177	9	27111154	TEK	TEK
kgp6403250	9	27111268	TEK	TEK
kgp10633477	9	27111293	TEK	TEK
kgp12281897	9	27111684	TEK	TEK
rs615375	9	27112311	TEK	TEK
kgp7962596	9	27113947	TEK	TEK
kgp27168249	9	27114299	TEK	TEK
kgp18492165	9	27114977	TEK	TEK
kgp10149526	9	27115121	TEK	TEK
kgp5994070	9	27115174	TEK	TEK
rs10738763	9	27115768	TEK	TEK
rs12554723	9	27116823	TEK	TEK
kgp12015829	9	27117744	TEK	TEK
kgp5855094	9	27118167	TEK	TEK
kgp361366	9	27118323	TEK	TEK
kgp18399727	9	27118618	TEK	TEK
kgp3771469	9	27118707	TEK	TEK
rs621786	9	27118807	TEK	TEK
kgp18320927	9	27118960	TEK	TEK
kgp9255466	9	27119375	TEK	TEK
kgp130246	9	27119499	TEK	TEK
kgp5961775	9	27119888	TEK	TEK
kgp5288658	9	27120194	TEK	TEK
rs666812	9	27120369	TEK	TEK
kgp11845085	9	27120630	TEK	TEK
kgp3041806	9	27121906	TEK	TEK
kgp9289311	9	27123225	TEK	TEK
rs603085	9	27123260	TEK	TEK
kgp196229	9	27123348	TEK	TEK
kgp3813318	9	27124128	TEK	TEK
kgp9046501	9	27124431	TEK	TEK
kgp1450279	9	27124574	TEK	TEK
rs4242698	9	27124745	TEK	TEK
kgp9903219	9	27124976	TEK	TEK
kgp6261607	9	27125467	TEK	TEK
kgp314624	9	27126415	TEK	TEK
kgp27414054	9	27126694	TEK	TEK
kgp5895256	9	27126919	TEK	TEK
kgp11020403	9	27129497	TEK	TEK
kgp27375437	9	27129611	TEK	TEK
kgp7506185	9	27130234	TEK	TEK
kgp12070665	9	27131053	TEK	TEK
kgp18461713	9	27131103	TEK	TEK
kgp27502231	9	27131914	TEK	TEK
kgp6969674	9	27132073	TEK	TEK
rs7044842	9	27132514	TEK	TEK
rs16911047	9	27133016	TEK	TEK
rs7032817	9	27133385	TEK	TEK
kgp27220282	9	27134248	TEK	TEK
rs17694796	9	27134636	TEK	TEK
kgp71023	9	27134683	TEK	TEK
rs10511799	9	27134868	TEK	TEK
kgp3798010	9	27134973	TEK	TEK
kgp9479262	9	27135336	TEK	TEK
kgp2955871	9	27135713	TEK	TEK
kgp1819474	9	27135718	TEK	TEK
rs7042119	9	27135831	TEK	TEK
rs7042267	9	27135962	TEK	TEK
kgp11337659	9	27136083	TEK	TEK
rs12552985	9	27136705	TEK	TEK
rs669441	9	27137242	TEK	TEK
kgp1440248	9	27137253	TEK	TEK
kgp370694	9	27137489	TEK	TEK
kgp7896449	9	27137729	TEK	TEK
kgp27298402	9	27137839	TEK	TEK
kgp12526031	9	27138783	TEK	TEK
rs11789885	9	27138898	TEK	TEK
kgp9826289	9	27140049	TEK	TEK
kgp4787478	9	27140413	TEK	TEK
kgp339146	9	27140566	TEK	TEK
kgp398685	9	27141293	TEK	TEK
kgp6903911	9	27142888	TEK	TEK
kgp12283245	9	27142894	TEK	TEK
kgp18515061	9	27143982	TEK	TEK
rs12001452	9	27144516	TEK	TEK
rs12005388	9	27144863	TEK	TEK
kgp18650219	9	27145300	TEK	TEK
kgp18283712	9	27145458	TEK	TEK
kgp8787136	9	27146241	TEK	TEK
kgp18321825	9	27147363	TEK	TEK
rs7853911	9	27147836	TEK	TEK
kgp2713769	9	27148155	TEK	TEK
rs7871178	9	27148475	TEK	TEK
kgp18448686	9	27148498	TEK	TEK
kgp27186383	9	27148606	TEK	TEK
kgp11528508	9	27149197	TEK	TEK
rs4878149	9	27149669	TEK	TEK
kgp18468965	9	27149795	TEK	TEK
kgp10820495	9	27150309	TEK	TEK
rs7034505	9	27151394	TEK	TEK
rs7862217	9	27151645	TEK	TEK
rs7035021	9	27151706	TEK	TEK
kgp10975354	9	27152034	TEK	TEK
kgp18513492	9	27152278	TEK	TEK
rs4601425	9	27152292	TEK	TEK
rs664461	9	27152308	TEK	TEK
kgp2292937	9	27152339	TEK	TEK
kgp691649	9	27152422	TEK	TEK
rs538679	9	27152724	TEK	TEK
rs599312	9	27153536	TEK	TEK
rs600728	9	27153866	TEK	TEK
rs507441	9	27153874	TEK	TEK
kgp1222246	9	27154092	TEK	TEK
kgp27510431	9	27154392	TEK	TEK
kgp9470693	9	27154419	TEK	TEK
kgp1226070	9	27154431	TEK	TEK
rs10511803	9	27154617	TEK	TEK
rs628873	9	27155544	TEK	TEK
kgp5538765	9	27155789	TEK	TEK
kgp7766643	9	27156574	TEK	TEK
kgp8725195	9	27156744	TEK	TEK
kgp11491077	9	27157144	TEK	TEK
kgp18602011	9	27157255	TEK	TEK
kgp9365492	9	27157617	TEK	TEK
kgp27173647	9	27157734	TEK	TEK
kgp18563973	9	27157914	TEK	TEK
kgp18245096	9	27158010	TEK	TEK
kgp27275582	9	27158192	TEK	TEK
kgp27253237	9	27158438	TEK	TEK
kgp10894559	9	27161420	TEK	TEK
kgp8216817	9	27161517	TEK	TEK
kgp9977744	9	27161735	TEK	TEK
rs1413825	9	27161811	TEK	TEK
kgp4232667	9	27161936	TEK	TEK
rs506685	9	27163395	TEK	TEK
kgp2106885	9	27163857	TEK	TEK
rs7036743	9	27164220	TEK	TEK
rs1107774	9	27164846	TEK	TEK
kgp9034838	9	27165000	TEK	TEK
rs671804	9	27165030	TEK	TEK
kgp18361050	9	27165340	TEK	TEK
kgp18479426	9	27165545	TEK	TEK
kgp11527001	9	27165754	TEK	TEK
kgp18263393	9	27165952	TEK	TEK
rs10967750	9	27166159	TEK	TEK
kgp6558125	9	27167194	TEK	TEK
kgp27371556	9	27167736	TEK	TEK
kgp18288740	9	27167878	TEK	TEK
rs10511802	9	27168315	TEK	TEK
kgp8828393	9	27168425	TEK	TEK
rs12349832	9	27168433	TEK	TEK
kgp18283329	9	27168468	TEK	TEK
kgp18647972	9	27168571	TEK	TEK
kgp18684587	9	27168654	TEK	TEK
kgp8271876	9	27168704	TEK	TEK
kgp6019706	9	27168970	TEK	TEK
kgp18386649	9	27169116	TEK	TEK
rs3818283	9	27169124	TEK	TEK
kgp5780036	9	27169190	TEK	TEK
kgp563224	9	27169704	TEK	TEK
rs565586	9	27170934	TEK	TEK
kgp27505651	9	27170992	TEK	TEK
rs7871318	9	27171311	TEK	TEK
rs10812529	9	27171373	TEK	TEK
kgp9053329	9	27172434	TEK	TEK
kgp18379073	9	27172446	TEK	TEK
kgp18487363	9	27172576	TEK	TEK
kgp18675439	9	27172735	TEK	TEK
kgp18612381	9	27172767	TEK	TEK
rs3739542	9	27172838	TEK	TEK
rs3824410	9	27173062	TEK	TEK
kgp52394	9	27173082	TEK	TEK
rs666478	9	27173180	TEK	TEK
kgp2528553	9	27173429	TEK	TEK
rs12554799	9	27173704	TEK	TEK
kgp2288251	9	27173939	TEK	TEK
kgp5852762	9	27174047	TEK	TEK
kgp9982634	9	27174426	TEK	TEK
kgp18530919	9	27174846	TEK	TEK
kgp9075789	9	27176006	TEK	TEK
kgp7007220	9	27176267	TEK	TEK
rs2208637	9	27176554	TEK	TEK
rs2224530	9	27176886	TEK	TEK
kgp4392054	9	27177372	TEK	TEK
kgp2346449	9	27178214	TEK	TEK
kgp6392553	9	27178697	TEK	TEK
rs7047856	9	27179075	TEK	TEK
kgp2968485	9	27179244	TEK	TEK
rs541615	9	27179530	TEK	TEK
kgp18371467	9	27179681	TEK	TEK
kgp6732846	9	27179834	TEK	TEK
kgp4881537	9	27180228	TEK	TEK
kgp10318378	9	27180534	TEK	TEK
kgp9944268	9	27180967	TEK	TEK
kgp4866617	9	27181761	TEK	TEK
kgp9976766	9	27182412	TEK	TEK
kgp1706671	9	27182602	TEK	TEK
rs669102	9	27182802	TEK	TEK
rs10967760	9	27182825	TEK	TEK
kgp9061157	9	27182887	TEK	TEK
kgp4077963	9	27182985	TEK	TEK
kgp5447903	9	27183363	TEK	TEK
kgp12470256	9	27183463	TEK	TEK
kgp18465553	9	27183598	TEK	TEK
kgp27225511	9	27183898	TEK	TEK
kgp4347371	9	27184319	TEK	TEK
rs16911136	9	27184714	TEK	TEK
kgp5258173	9	27184755	TEK	TEK
kgp27386643	9	27184778	TEK	TEK
kgp4558125	9	27185101	TEK	TEK
kgp1823932	9	27185251	TEK	TEK
rs17834811	9	27185762	TEK	TEK
kgp9748530	9	27186033	TEK	TEK
kgp18671383	9	27186242	TEK	TEK
kgp11501343	9	27186857	TEK	TEK
kgp6766232	9	27187216	TEK	TEK
rs581724	9	27187422	TEK	TEK
kgp2475885	9	27187450	TEK	TEK
kgp5906089	9	27187508	TEK	TEK
kgp1932654	9	27187841	TEK	TEK
kgp4601022	9	27188026	TEK	TEK
kgp18526356	9	27188468	TEK	TEK
rs2152066	9	27188862	TEK	TEK
kgp4531647	9	27189869	TEK	TEK
kgp8000820	9	27189959	TEK	TEK
kgp18378433	9	27190492	TEK	TEK
kgp27198096	9	27190545	TEK	TEK
rs1334811	9	27190655	TEK	TEK
kgp27254943	9	27190721	TEK	TEK
rs481294	9	27190890	TEK	TEK
rs3780317	9	27190992	TEK	TEK
kgp2054166	9	27191568	TEK	TEK
kgp3431808	9	27191796	TEK	TEK
rs2224529	9	27192036	TEK	TEK
kgp27393598	9	27192428	TEK	TEK
kgp3462055	9	27193311	TEK	TEK
kgp6667066	9	27193343	TEK	TEK
kgp11624773	9	27193385	TEK	TEK
kgp12427376	9	27193473	TEK	TEK
rs4879250	9	27193503	TEK	TEK
rs491892	9	27193541	TEK	TEK
kgp11044362	9	27193588	TEK	TEK
rs578327	9	27193847	TEK	TEK
kgp10747553	9	27194389	TEK	TEK
kgp5012012	9	27195053	TEK	TEK
rs633903	9	27196119	TEK	TEK
rs3780315	9	27196290	TEK	TEK
kgp5913021	9	27196494	TEK	TEK
rs10812532	9	27197282	TEK	TEK
kgp4663125	9	27197368	TEK	TEK
kgp1220304	9	27197486	TEK	TEK
kgp18404779	9	27197557	TEK	TEK
GA007400	9	27197598	TEK	TEK
kgp3180428	9	27199144	TEK	TEK
kgp27462532	9	27199165	TEK	TEK
rs7027984	9	27199373	TEK	TEK
kgp10634038	9	27199521	TEK	TEK
rs4242670	9	27200738	TEK	TEK
kgp11346423	9	27201074	TEK	TEK
kgp2709236	9	27201200	TEK	TEK
kgp18276020	9	27201330	TEK	TEK
kgp3273033	9	27201691	TEK	TEK
rs692946	9	27201830	TEK	TEK
kgp27248060	9	27201963	TEK	TEK
rs1413829	9	27201968	TEK	TEK
rs7876024	9	27202663	TEK	TEK
rs7862047	9	27202727	TEK	TEK
rs639225	9	27202870	TEK	TEK
kgp12038402	9	27203002	TEK	TEK
kgp18305367	9	27203078	TEK	TEK
rs638203	9	27203134	TEK	TEK
kgp18550799	9	27203144	TEK	TEK
rs2756900	9	27203625	TEK	TEK
kgp2011983	9	27203696	TEK	TEK
kgp4110765	9	27203764	TEK	TEK
kgp12343687	9	27204175	TEK	TEK
rs542913	9	27205021	TEK	TEK
kgp18631173	9	27205439	TEK	TEK
kgp11136805	9	27205551	TEK	TEK
rs510101	9	27206307	TEK	TEK
kgp2651128	9	27206349	TEK	TEK
kgp9882918	9	27206669	TEK	TEK
kgp18319362	9	27206822	TEK	TEK
kgp8740153	9	27206825	TEK	TEK
rs560551	9	27208252	TEK	TEK
rs641848	9	27208857	TEK	TEK
kgp8138832	9	27209422	TEK	TEK
rs2273720	9	27209469	TEK	TEK
kgp3463511	9	27210401	TEK	TEK
kgp1992185	9	27210756	TEK	TEK
kgp10384845	9	27212005	TEK	TEK
rs10757641	9	27212360	TEK	TEK
kgp27383445	9	27212856	TEK	TEK
rs1111782	9	27212966	TEK	TEK
rs3737188	9	27213580	TEK	TEK
kgp526409	9	27213612	TEK	TEK
kgp11582031	9	27213619	TEK	TEK
rs3737187	9	27213772	TEK	TEK
kgp18528102	9	27213849	TEK	TEK
kgp5222983	9	27213896	TEK	TEK
kgp6558509	9	27214150	TEK	TEK
kgp18624395	9	27214190	TEK	TEK
kgp5162361	9	27214371	TEK	TEK
kgp4126393	9	27214685	TEK	TEK
rs534129	9	27214719	TEK	TEK
kgp10993398	9	27214846	TEK	TEK
kgp3874749	9	27214887	TEK	TEK
rs536078	9	27214972	TEK	TEK
kgp9067365	9	27214989	TEK	TEK
kgp8990121	9	27215039	TEK	TEK
kgp3497450	9	27215110	TEK	TEK
kgp9097311	9	27215497	TEK	TEK
kgp18395409	9	27215536	TEK	TEK
kgp7680052	9	27215690	TEK	TEK
kgp11059769	9	27215792	TEK	TEK
kgp3024207	9	27215882	TEK	TEK
kgp18430748	9	27216098	TEK	TEK
kgp18648371	9	27216428	TEK	TEK
kgp10236534	9	27216870	TEK	TEK
kgp3840572	9	27217383	TEK	TEK
kgp18360463	9	27217407	TEK	TEK
kgp8120784	9	27217518	TEK	TEK
rs550190	9	27217947	TEK	TEK
rs550982	9	27217992	TEK	TEK
rs2756901	9	27218053	TEK	TEK
kgp219801	9	27218726	TEK	TEK
kgp27326527	9	27218802	TEK	TEK
kgp27248726	9	27218908	TEK	TEK
kgp4932073	9	27218943	TEK	TEK
kgp1807114	9	27218999	TEK	TEK
rs3736819	9	27219058	TEK	TEK
kgp7125477	9	27219280	TEK	TEK
kgp601144	9	27219600	TEK	TEK
kgp5403698	9	27219640	TEK	TEK
rs2273719	9	27220066	TEK	TEK
rs2273718	9	27220094	TEK	TEK
kgp12562509	9	27224516	TEK	TEK
rs7024846	9	27226947	TEK	TEK
kgp8447165	9	27227229	TEK	TEK
kgp5593491	9	27227992	TEK	TEK
rs2273717	9	27228022	TEK	TEK
kgp550808	9	27228058	TEK	TEK
kgp4383379	9	27228154	TEK	TEK
kgp27355958	9	27228200	TEK	TEK
rs10812540	9	27228564	TEK	TEK
rs1555454	9	27228754	TEK	TEK
rs2273715	9	27229141	TEK	TEK
kgp8161909	9	27229282	TEK	TEK
kgp27489732	9	27229436	TEK	TEK
kgp238017	9	27229544	TEK	TEK
kgp18261540	9	27229611	TEK	TEK
rs857	9	27229786	TEK	TEK
kgp3202774	9	27229947	TEK	TEK
kgp27321397	9	27230048	TEK	TEK
rs9987817	9	27230152	TEK	TEK
